# Supplementary material
Source: HighWire-hosted journal article supplement (https://drc.bmj.com/content/11/3/e003167)
Supplement: inline-supplementary-material-1 [file inline-supplementary-material-1.pdf]

| Supplementary Table 1. Selected IVs in MR analysis |                   |         |             |        |       |          |        |       |           |            |         |        |       |       |            |
|----------------------------------------------------|-------------------|---------|-------------|--------|-------|----------|--------|-------|-----------|------------|---------|--------|-------|-------|------------|
| exposure                                           | outcome           | F-value | SNP         | A1     | A2    | exposure |        |       |           |            | outcome |        |       |       |            |
|                                                    |                   |         |             |        |       | eaf      | beta   | se    | pval      | samplesize | eaf     | beta   | se    | pval  | samplesize |
| Type 1 diabetes                                    | COVID-19 positive | 199.98  | rs1004707   | T      | C     | 0.225    | 0.107  | 0.019 | 4.31E-08  | 173981     | 0.222   | 0.012  | 0.015 | 0.435 | 98377      |
|                                                    |                   |         | rs10214237  | C      | T     | 0.274    | -0.107 | 0.016 | 2.32E-11  | 173981     | 0.275   | -0.007 | 0.014 | 0.607 | 98377      |
|                                                    |                   |         | rs1022674   | C      | A     | 0.226    | 0.107  | 0.017 | 4.61E-10  | 173981     | 0.242   | 0.012  | 0.015 | 0.423 | 98377      |
|                                                    |                   |         | rs1048055   | A      | C     | 0.340    | -0.110 | 0.016 | 1.03E-11  | 173981     | 0.335   | 0.005  | 0.013 | 0.734 | 98377      |
|                                                    |                   |         | rs1063478   | T      | C     | 0.120    | -0.365 | 0.024 | 3.15E-51  | 173981     | 0.119   | 0.021  | 0.019 | 0.272 | 98377      |
|                                                    |                   |         | rs11085725  | T      | C     | 0.294    | -0.126 | 0.017 | 5.86E-14  | 173981     | 0.293   | 0.010  | 0.014 | 0.482 | 98377      |
|                                                    |                   |         | rs111552148 | G      | A     | 0.042    | -0.328 | 0.039 | 4.97E-17  | 173981     | 0.039   | -0.022 | 0.033 | 0.493 | 98377      |
|                                                    |                   |         | rs11203203  | A      | G     | 0.365    | 0.129  | 0.015 | 3.25E-17  | 173981     | 0.367   | -0.010 | 0.013 | 0.454 | 98377      |
|                                                    |                   |         | rs113019108 | T      | C     | 0.019    | -0.544 | 0.055 | 5.03E-23  | 173981     | 0.017   | -0.015 | 0.048 | 0.762 | 98377      |
|                                                    |                   |         | rs114898531 | G      | A     | 0.049    | -0.211 | 0.035 | 9.03E-10  | 173981     | 0.048   | -0.036 | 0.030 | 0.221 | 98377      |
|                                                    |                   |         | rs115018313 | C      | T     | 0.020    | 1.496  | 0.036 | 1.00E-200 | 173981     | 0.023   | -0.054 | 0.042 | 0.196 | 98377      |
|                                                    |                   |         | rs115075841 | T      | C     | 0.072    | -0.560 | 0.044 | 5.79E-38  | 173981     | 0.073   | 0.008  | 0.024 | 0.746 | 98377      |
|                                                    |                   |         | rs115256213 | G      | A     | 0.013    | -0.586 | 0.090 | 6.60E-11  | 173981     | 0.014   | -0.027 | 0.054 | 0.612 | 98377      |
|                                                    |                   |         | rs115892333 | A      | G     | 0.056    | -0.583 | 0.041 | 7.37E-45  | 173981     | 0.058   | 0.029  | 0.027 | 0.283 | 98377      |
|                                                    |                   |         | rs11651753  | T      | C     | 0.428    | -0.093 | 0.015 | 3.24E-10  | 173981     | 0.429   | -0.010 | 0.013 | 0.445 | 98377      |
|                                                    |                   |         | rs118124843 | T      | C     | 0.017    | -0.372 | 0.063 | 3.36E-09  | 173981     | 0.017   | -0.079 | 0.048 | 0.102 | 98377      |
|                                                    |                   |         | rs11978267  | G      | A     | 0.282    | -0.089 | 0.016 | 3.10E-08  | 173981     | 0.277   | -0.011 | 0.014 | 0.424 | 98377      |
|                                                    |                   |         | rs12130424  | C      | T     | 0.073    | 0.166  | 0.026 | 2.12E-10  | 173981     | 0.080   | -0.006 | 0.023 | 0.789 | 98377      |
|                                                    |                   |         | rs12175489  | A      | G     | 0.123    | -0.354 | 0.022 | 2.09E-58  | 173981     | 0.119   | 0.045  | 0.020 | 0.024 | 98377      |
|                                                    |                   |         | rs12192673  | G      | T     | 0.046    | -0.372 | 0.033 | 5.93E-30  | 173981     | 0.043   | -0.072 | 0.031 | 0.019 | 98377      |
|                                                    |                   |         | rs12207915  | C      | T     | 0.057    | -0.361 | 0.031 | 1.01E-30  | 173981     | 0.054   | 0.014  | 0.028 | 0.610 | 98377      |
|                                                    |                   |         | rs12215593  | G      | A     | 0.367    | -0.158 | 0.016 | 3.37E-24  | 173981     | 0.364   | -0.021 | 0.013 | 0.108 | 98377      |
|                                                    |                   |         | rs1233478   | T      | G     | 0.192    | 0.405  | 0.018 | 1.44E-108 | 173981     | 0.196   | 0.022  | 0.016 | 0.157 | 98377      |
|                                                    |                   |         | rs12506688  | T      | C     | 0.300    | 0.101  | 0.016 | 1.44E-10  | 173981     | 0.304   | -0.007 | 0.014 | 0.584 | 98377      |
|                                                    |                   |         | rs12828640  | A      | G     | 0.416    | 0.104  | 0.015 | 2.80E-12  | 173981     | 0.421   | -0.015 | 0.013 | 0.241 | 98377      |
|                                                    |                   |         | rs12927355  | T      | C     | 0.323    | -0.155 | 0.016 | 7.29E-23  | 173981     | 0.322   | 0.008  | 0.013 | 0.567 | 98377      |
|                                                    |                   |         | rs12979891  | C      | T     | 0.468    | -0.094 | 0.015 | 2.25E-10  | 173981     | 0.462   | 0.011  | 0.013 | 0.387 | 98377      |
|                                                    |                   |         | rs13212534  | A      | G     | 0.093    | 0.313  | 0.029 | 4.27E-27  | 173981     | 0.097   | 0.008  | 0.021 | 0.711 | 98377      |
|                                                    |                   |         | rs1352312   | G      | T     | 0.291    | -0.135 | 0.021 | 6.60E-11  | 173981     | 0.285   | 0.030  | 0.014 | 0.030 | 98377      |
|                                                    |                   |         | rs144536316 | A      | G     | 0.016    | 0.452  | 0.055 | 3.40E-16  | 173981     | 0.017   | -0.119 | 0.050 | 0.018 | 98377      |
|                                                    |                   |         | rs151233    | T      | C     | 0.131    | 0.164  | 0.024 | 7.46E-12  | 173981     | 0.130   | 0.004  | 0.019 | 0.821 | 98377      |
|                                                    |                   |         | rs156743    | C      | T     | 0.147    | 0.413  | 0.022 | 2.48E-77  | 173981     | 0.145   | 0.019  | 0.018 | 0.288 | 98377      |
|                                                    |                   |         | rs1574285   | G      | T     | 0.408    | 0.103  | 0.015 | 1.69E-12  | 173981     | 0.400   | 0.006  | 0.013 | 0.639 | 98377      |
|                                                    |                   |         | rs1613191   | A      | G     | 0.017    | 0.579  | 0.052 | 2.78E-28  | 173981     | 0.017   | -0.001 | 0.050 | 0.987 | 98377      |
|                                                    |                   |         | rs1615504   | T      | C     | 0.472    | 0.103  | 0.015 | 1.22E-12  | 173981     | 0.475   | 0.021  | 0.013 | 0.091 | 98377      |
|                                                    |                   |         | rs17179851  | C      | T     | 0.102    | 0.364  | 0.022 | 2.89E-63  | 173981     | 0.105   | 0.012  | 0.021 | 0.574 | 98377      |
|                                                    |                   |         | rs17207622  | T      | G     | 0.027    | -0.625 | 0.061 | 1.48E-24  | 173981     | 0.026   | -0.039 | 0.039 | 0.316 | 98377      |
|                                                    |                   |         | rs17630235  | A      | G     | 0.409    | 0.191  | 0.015 | 4.14E-38  | 173981     | 0.410   | 0.009  | 0.013 | 0.489 | 98377      |
|                                                    |                   |         | rs17652674  | A      | C     | 0.194    | 0.100  | 0.018 | 2.20E-08  | 173981     | 0.196   | 0.012  | 0.016 | 0.430 | 98377      |
|                                                    |                   |         | rs192321865 | T      | C     | 0.065    | 0.225  | 0.039 | 7.53E-09  | 173981     | 0.064   | -0.049 | 0.026 | 0.057 | 98377      |
|                                                    |                   |         | rs1990760   | C      | T     | 0.395    | -0.119 | 0.015 | 1.83E-15  | 173981     | 0.392   | -0.010 | 0.013 | 0.450 | 98377      |
|                                                    |                   |         | rs1994565   | G      | T     | 0.293    | -0.096 | 0.017 | 1.84E-08  | 173981     | 0.297   | -0.013 | 0.014 | 0.339 | 98377      |
|                                                    |                   |         | rs204996    | T      | C     | 0.057    | -0.969 | 0.058 | 9.32E-62  | 173981     | 0.060   | -0.035 | 0.026 | 0.188 | 98377      |
|                                                    |                   |         | rs210211    | G      | A     | 0.104    | -0.311 | 0.028 | 1.16E-29  | 173981     | 0.103   | 0.007  | 0.021 | 0.752 | 98377      |
|                                                    |                   |         | rs2212434   | T      | C     | 0.458    | 0.080  | 0.015 | 3.54E-08  | 173981     | 0.449   | -0.002 | 0.013 | 0.884 | 98377      |
|                                                    |                   |         | rs2289702   | T      | C     | 0.101    | -0.171 | 0.026 | 7.08E-11  | 173981     | 0.104   | -0.004 | 0.020 | 0.854 | 98377      |
|                                                    |                   |         | rs2313430   | C      | T     | 0.482    | -0.085 | 0.015 | 5.75E-09  | 173981     | 0.484   | -0.005 | 0.012 | 0.695 | 98377      |
|                                                    |                   |         | rs2395471   | A      | G     | 0.355    | -0.519 | 0.017 | 1.00E-200 | 173981     | 0.360   | 0.008  | 0.013 | 0.556 | 98377      |
|                                                    |                   |         | rs241435    | A      | G     | 0.031    | -0.783 | 0.074 | 5.05E-26  | 173981     | 0.033   | -0.042 | 0.035 | 0.233 | 98377      |
|                                                    |                   |         | rs2476601   | A      | G     | 0.094    | 0.544  | 0.022 | 4.54E-135 | 173981     | 0.101   | 0.027  | 0.021 | 0.194 | 98377      |
|                                                    |                   |         | rs2499743   | A      | C     | 0.225    | 0.128  | 0.019 | 1.37E-11  | 173981     | 0.220   | -0.008 | 0.016 | 0.613 | 98377      |
|                                                    |                   |         | rs2516698   | A      | G     | 0.052    | -0.278 | 0.045 | 6.67E-10  | 173981     | 0.053   | 0.006  | 0.028 | 0.832 | 98377      |
|                                                    |                   |         | rs2844466   | C      | T     | 0.360    | 0.487  | 0.015 | 1.00E-200 | 173981     | 0.356   | 0.000  | 0.013 | 0.976 | 98377      |
|                                                    |                   |         | rs28746904  | C      | T     | 0.228    | -0.944 | 0.024 | 1.00E-200 | 173981     | 0.242   | -0.004 | 0.015 | 0.767 | 98377      |
|                                                    |                   |         | rs28893513  | G      | A     | 0.120    | -0.467 | 0.026 | 1.28E-69  | 173981     | 0.123   | 0.002  | 0.019 | 0.912 | 98377      |
|                                                    |                   |         | rs3024505   | A      | G     | 0.159    | -0.124 | 0.021 | 1.80E-09  | 173981     | 0.156   | 0.006  | 0.017 | 0.732 | 98377      |
|                                                    |                   |         | rs3087243   | A      | G     | 0.453    | -0.148 | 0.015 | 3.70E-23  | 173981     | 0.450   | 0.003  | 0.013 | 0.819 | 98377      |
|                                                    |                   |         | rs3093971   | A      | G     | 0.103    | 0.765  | 0.026 | 6.25E-188 | 173981     | 0.101   | 0.040  | 0.021 | 0.052 | 98377      |
|                                                    |                   |         | rs3117244   | A      | G     | 0.127    | -0.609 | 0.024 | 4.59E-142 | 173981     | 0.124   | -0.004 | 0.019 | 0.850 | 98377      |
|                                                    |                   |         | rs3130363   | G      | A     | 0.141    | 0.560  | 0.022 | 3.00E-149 | 173981     | 0.142   | 0.008  | 0.018 | 0.673 | 98377      |
|                                                    |                   |         | rs3130666   | A      | G     | 0.041    | -0.353 | 0.058 | 1.51E-09  | 173981     | 0.043   | 0.024  | 0.031 | 0.438 | 98377      |
|                                                    |                   |         | rs3134962   | A      | G     | 0.169    | 0.686  | 0.021 | 1.00E-200 | 173981     | 0.171   | -0.010 | 0.017 | 0.528 | 98377      |
|                                                    |                   |         | rs3184504   | T      | C     | 0.487    | 0.218  | 0.015 | 4.62E-49  | 173981     | 0.484   | -0.003 | 0.012 | 0.790 | 98377      |
|                                                    |                   |         | rs34864796  | A      | G     | 0.125    | 0.461  | 0.024 | 8.74E-82  | 173981     | 0.122   | 0.020  | 0.019 | 0.301 | 98377      |
|                                                    |                   |         | rs36104352  | C      | A     | 0.123    | -0.155 | 0.025 | 6.17E-10  | 173981     | 0.121   | -0.018 | 0.019 | 0.340 | 98377      |
|                                                    |                   |         | rs3763355   | C      | T     | 0.065    | 0.606  | 0.027 | 4.95E-113 | 173981     | 0.062   | -0.029 | 0.026 | 0.262 | 98377      |
|                                                    |                   |         | rs3827505   | C      | T     | 0.167    | -0.143 | 0.020 | 8.39E-13  | 173981     | 0.167   | 0.009  | 0.017 | 0.589 | 98377      |
|                                                    |                   |         | rs41265836  | G      | A     | 0.046    | 0.478  | 0.035 | 8.53E-42  | 173981     | 0.047   | -0.013 | 0.030 | 0.677 | 98377      |
|                                                    |                   |         | rs41267086  | A      | G     | 0.049    | -0.277 | 0.035 | 1.54E-15  | 173981     | 0.049   | -0.041 | 0.029 | 0.153 | 98377      |
|                                                    |                   |         | rs41268924  | A      | G     | 0.061    | 0.211  | 0.038 | 1.96E-08  | 173981     | 0.058   | -0.006 | 0.027 | 0.817 | 98377      |
|                                                    |                   |         | rs434943    | A      | G     | 0.331    | -0.099 | 0.017 | 8.22E-09  | 173981     | 0.335   | -0.004 | 0.013 | 0.762 | 98377      |
|                                                    |                   |         | rs45485691  | A      | G     | 0.275    | 0.107  | 0.016 | 5.53E-12  | 173981     | 0.272   | -0.013 | 0.014 | 0.344 | 98377      |
|                                                    |                   |         | rs4804000   | A      | G     | 0.188    | -0.131 | 0.019 | 1.27E-11  | 173981     | 0.191   | 0.007  | 0.016 | 0.638 | 98377      |
|                                                    |                   |         | rs4947258   | G      | A     | 0.121    | 0.705  | 0.023 | 1.00E-200 | 173981     | 0.120   | 0.010  | 0.019 | 0.603 | 98377      |
|                                                    |                   |         | rs537544    | C      | T     | 0.384    | 0.087  | 0.015 | 8.37E-09  | 173981     | 0.375   | -0.005 | 0.013 | 0.675 | 98377      |
|                                                    |                   |         | rs542907    | A      | G     | 0.439    | -0.081 | 0.015 | 3.96E-08  | 173981     | 0.448   | -0.009 | 0.013 | 0.459 | 98377      |
| rs55844831                                         | G                 | A       | 0.041       | 0.588  | 0.031 | 3.09E-82 | 173981 | 0.040 | -0.052    | 0.033      | 0.113   | 98377  |       |       |            |
| rs56100858                                         | T                 | C       | 0.011       | 0.728  | 0.047 | 2.92E-55 | 173981 | 0.012 | 0.112     | 0.056      | 0.047   | 98377  |       |       |            |
| rs56111713                                         | T                 | C       | 0.008       | 0.493  | 0.081 | 9.84E-10 | 173981 | 0.008 | -0.037    | 0.070      | 0.602   | 98377  |       |       |            |
| rs56302826                                         | G                 | T       | 0.032       | -0.403 | 0.046 | 1.82E-18 | 173981 | 0.033 | -0.049    | 0.035      | 0.164   | 98377  |       |       |            |
| rs5763842                                          | A                 | G       | 0.033       | 0.150  | 0.015 | 1.49E-23 | 173981 | 0.036 | 0.000     | 0.013      | 0.975   | 98377  |       |       |            |
| rs58223158                                         | G                 | A       | 0.384       | 0.329  | 0.038 | 3.48E-18 | 173981 | 0.035 | 0.055     | 0.034      | 0.102   | 98377  |       |       |            |
| rs6000602                                          | A                 | C       | 0.237       | 0.102  | 0.018 | 6.16E-09 | 173981 | 0.230 | 0.006     | 0.015      | 0.690   | 98377  |       |       |            |
| rs60888743                                         | G                 | A       | 0.252       | -0.137 | 0.017 | 9.82E-16 | 173981 | 0.260 | 0.033     | 0.014      | 0.019   | 98377  |       |       |            |
| rs61839660                                         | T                 | C       | 0.102       | -0.371 | 0.031 | 3.49E-32 | 173981 | 0.099 | -0.034    | 0.021      | 0.100   | 98377  |       |       |            |
| rs62397629                                         | A                 | C       | 0.052       | -0.217 | 0.034 | 1.31E-10 | 173981 | 0.053 | 0.021     | 0.029      | 0.459   | 98377  |       |       |            |
| rs62407529                                         | T                 | C       | 0.060       | -0.344 | 0.036 | 1.12E-21 | 173981 | 0.053 | 0.013     | 0.029      | 0.651   | 98377  |       |       |            |
| rs62621992                                         | T                 | C       | 0.016       | 0.675  | 0.055 | 1.21E-34 | 173981 | 0.018 | -0.020    | 0.047      | 0.668   | 98377  |       |       |            |
| rs6457109                                          | C                 | T       | 0.090       | 0.173  | 0.023 | 4.41E-14 | 173981 | 0.091 | 0.035     | 0.022      | 0.104   | 98377  |       |       |            |

Ma X-L, et al. *BMJ Open Diab Res Care* 2023; 11:e003167. doi: 10.1136/bmjdr-2022-003167

|                 |                 |        |            |        |       |           |        |       |           |        |       |        |       |       |       |
|-----------------|-----------------|--------|------------|--------|-------|-----------|--------|-------|-----------|--------|-------|--------|-------|-------|-------|
| type 1 diabetes | severe COVID-19 | 201.15 | rs3117244  | A      | G     | 0.127     | -0.609 | 0.024 | 4.59E-142 | 173981 | 0.124 | -0.072 | 0.047 | 0.126 | 16551 |
|                 |                 |        | rs3130363  | G      | A     | 0.141     | 0.560  | 0.022 | 3.00E-149 | 173981 | 0.144 | -0.011 | 0.044 | 0.800 | 16551 |
|                 |                 |        | rs3130666  | A      | G     | 0.041     | -0.353 | 0.058 | 1.51E-09  | 173981 | 0.043 | -0.101 | 0.076 | 0.183 | 16551 |
|                 |                 |        | rs3134962  | A      | G     | 0.169     | 0.686  | 0.021 | 1.00E-200 | 173981 | 0.171 | 0.039  | 0.041 | 0.349 | 16551 |
|                 |                 |        | rs3184504  | T      | C     | 0.487     | 0.218  | 0.015 | 4.62E-49  | 173981 | 0.483 | 0.003  | 0.031 | 0.929 | 16551 |
|                 |                 |        | rs34864796 | A      | G     | 0.125     | 0.461  | 0.024 | 8.74E-82  | 173981 | 0.125 | 0.000  | 0.047 | 0.999 | 16551 |
|                 |                 |        | rs36104352 | C      | A     | 0.123     | -0.155 | 0.025 | 6.17E-10  | 173981 | 0.119 | 0.031  | 0.047 | 0.908 | 16551 |
|                 |                 |        | rs3763355  | C      | T     | 0.065     | 0.606  | 0.027 | 4.95E-113 | 173981 | 0.060 | -0.007 | 0.065 | 0.915 | 16551 |
|                 |                 |        | rs3827505  | C      | T     | 0.167     | -0.143 | 0.020 | 8.39E-13  | 173981 | 0.167 | -0.060 | 0.041 | 0.146 | 16551 |
|                 |                 |        | rs41265836 | G      | A     | 0.046     | 0.478  | 0.035 | 8.53E-42  | 173981 | 0.046 | -0.008 | 0.076 | 0.921 | 16551 |
|                 |                 |        | rs41267086 | A      | G     | 0.049     | -0.277 | 0.035 | 1.54E-15  | 173981 | 0.047 | -0.122 | 0.072 | 0.091 | 16551 |
|                 |                 |        | rs41268924 | A      | G     | 0.061     | 0.211  | 0.038 | 1.96E-08  | 173981 | 0.058 | -0.010 | 0.067 | 0.878 | 16551 |
|                 |                 |        | rs434943   | A      | G     | 0.331     | -0.099 | 0.017 | 8.22E-09  | 173981 | 0.335 | -0.006 | 0.032 | 0.858 | 16551 |
|                 |                 |        | rs45485691 | A      | G     | 0.275     | 0.107  | 0.016 | 5.53E-12  | 173981 | 0.269 | -0.021 | 0.035 | 0.539 | 16551 |
|                 |                 |        | rs4804000  | A      | G     | 0.188     | -0.131 | 0.019 | 1.27E-11  | 173981 | 0.192 | -0.052 | 0.039 | 0.183 | 16551 |
|                 |                 |        | rs4947258  | G      | A     | 0.121     | 0.705  | 0.023 | 1.00E-200 | 173981 | 0.122 | -0.011 | 0.047 | 0.823 | 16551 |
|                 |                 |        | rs537544   | C      | T     | 0.384     | 0.087  | 0.015 | 8.37E-09  | 173981 | 0.375 | -0.032 | 0.032 | 0.317 | 16551 |
|                 |                 |        | rs542907   | A      | G     | 0.439     | -0.081 | 0.015 | 3.96E-08  | 173981 | 0.446 | -0.028 | 0.031 | 0.366 | 16551 |
|                 |                 |        | rs55844831 | G      | A     | 0.041     | 0.588  | 0.031 | 3.09E-82  | 173981 | 0.038 | -0.034 | 0.081 | 0.677 | 16551 |
|                 |                 |        | rs56100858 | T      | C     | 0.011     | 0.728  | 0.047 | 2.92E-55  | 173981 | 0.013 | -0.032 | 0.133 | 0.809 | 16551 |
|                 |                 |        | rs56111713 | T      | G     | 0.008     | 0.493  | 0.081 | 9.84E-10  | 173981 | 0.008 | 0.233  | 0.177 | 0.189 | 16551 |
|                 |                 |        | rs56302826 | G      | T     | 0.032     | -0.403 | 0.046 | 1.82E-18  | 173981 | 0.031 | 0.019  | 0.090 | 0.829 | 16551 |
|                 |                 |        | rs5763842  | A      | G     | 0.383     | 0.150  | 0.015 | 1.49E-23  | 173981 | 0.396 | 0.064  | 0.032 | 0.043 | 16551 |
|                 |                 |        | rs58223158 | G      | A     | 0.034     | 0.329  | 0.038 | 3.48E-18  | 173981 | 0.037 | -0.013 | 0.082 | 0.878 | 16551 |
|                 |                 |        | rs6000602  | A      | C     | 0.237     | 0.102  | 0.018 | 6.16E-09  | 173981 | 0.230 | 0.008  | 0.036 | 0.826 | 16551 |
|                 |                 |        | rs60888743 | G      | A     | 0.252     | -0.137 | 0.017 | 9.82E-16  | 173981 | 0.264 | 0.020  | 0.035 | 0.565 | 16551 |
|                 |                 |        | rs61839660 | T      | C     | 0.102     | -0.371 | 0.031 | 3.49E-32  | 173981 | 0.097 | -0.021 | 0.052 | 0.685 | 16551 |
|                 |                 |        | rs62397629 | A      | C     | 0.052     | -0.217 | 0.034 | 1.31E-10  | 173981 | 0.054 | -0.173 | 0.070 | 0.013 | 16551 |
|                 |                 |        | rs62407529 | T      | C     | 0.060     | -0.344 | 0.036 | 1.12E-21  | 173981 | 0.053 | 0.050  | 0.071 | 0.481 | 16551 |
|                 |                 |        | rs62621992 | T      | C     | 0.016     | 0.675  | 0.055 | 1.21E-34  | 173981 | 0.018 | 0.192  | 0.119 | 0.105 | 16551 |
|                 |                 |        | rs6457109  | C      | T     | 0.090     | 0.173  | 0.023 | 4.41E-14  | 173981 | 0.094 | -0.015 | 0.053 | 0.782 | 16551 |
|                 |                 |        | rs6489856  | A      | C     | 0.309     | 0.112  | 0.016 | 2.54E-12  | 173981 | 0.307 | 0.009  | 0.033 | 0.795 | 16551 |
|                 |                 |        | rs6912701  | T      | C     | 0.012     | -0.518 | 0.075 | 4.67E-12  | 173981 | 0.015 | 0.013  | 0.129 | 0.922 | 16551 |
|                 |                 |        | rs6913182  | T      | C     | 0.170     | -0.921 | 0.029 | 1.00E-200 | 173981 | 0.173 | 0.062  | 0.041 | 0.133 | 16551 |
|                 |                 |        | rs705704   | A      | G     | 0.339     | 0.196  | 0.015 | 1.89E-37  | 173981 | 0.334 | 0.014  | 0.033 | 0.666 | 16551 |
|                 |                 |        | rs71565365 | A      | G     | 0.073     | -0.201 | 0.028 | 1.29E-12  | 173981 | 0.077 | 0.041  | 0.057 | 0.466 | 16551 |
|                 |                 |        | rs7237497  | T      | C     | 0.165     | 0.177  | 0.020 | 1.17E-18  | 173981 | 0.164 | 0.056  | 0.042 | 0.184 | 16551 |
|                 |                 |        | rs73069541 | G      | A     | 0.236     | -0.107 | 0.018 | 3.07E-09  | 173981 | 0.237 | -0.004 | 0.036 | 0.910 | 16551 |
|                 |                 |        | rs73391152 | T      | G     | 0.055     | -0.209 | 0.038 | 3.27E-08  | 173981 | 0.056 | -0.037 | 0.067 | 0.576 | 16551 |
|                 |                 |        | rs73396583 | C      | T     | 0.102     | -0.296 | 0.031 | 1.80E-21  | 173981 | 0.105 | -0.005 | 0.050 | 0.918 | 16551 |
|                 |                 |        | rs73400833 | T      | C     | 0.020     | -0.658 | 0.050 | 1.02E-39  | 173981 | 0.024 | -0.179 | 0.101 | 0.076 | 16551 |
|                 |                 |        | rs74969061 | A      | G     | 0.020     | -0.286 | 0.049 | 7.29E-09  | 173981 | 0.023 | 0.031  | 0.104 | 0.765 | 16551 |
|                 |                 |        | rs75545083 | T      | C     | 0.053     | -0.267 | 0.041 | 6.14E-11  | 173981 | 0.057 | -0.012 | 0.067 | 0.859 | 16551 |
|                 |                 |        | rs77154676 | C      | T     | 0.171     | -0.134 | 0.023 | 6.60E-09  | 173981 | 0.171 | 0.026  | 0.041 | 0.530 | 16551 |
|                 |                 |        | rs773560   | A      | G     | 0.270     | 0.148  | 0.016 | 3.13E-19  | 173981 | 0.278 | -0.006 | 0.034 | 0.860 | 16551 |
|                 |                 |        | rs7755997  | G      | A     | 0.412     | 0.221  | 0.015 | 2.87E-51  | 173981 | 0.409 | -0.015 | 0.031 | 0.640 | 16551 |
|                 |                 |        | rs7772373  | G      | A     | 0.077     | -0.406 | 0.042 | 1.44E-22  | 173981 | 0.074 | 0.029  | 0.058 | 0.614 | 16551 |
|                 |                 |        | rs78354120 | T      | C     | 0.014     | -0.429 | 0.071 | 1.16E-09  | 173981 | 0.014 | 0.187  | 0.132 | 0.155 | 16551 |
|                 |                 |        | rs8011931  | G      | A     | 0.276     | 0.090  | 0.015 | 5.95E-09  | 173981 | 0.281 | -0.042 | 0.035 | 0.224 | 16551 |
|                 |                 |        | rs8013873  | T      | C     | 0.185     | -0.163 | 0.023 | 4.77E-13  | 173981 | 0.181 | -0.007 | 0.040 | 0.872 | 16551 |
| rs8062123       | T               | G      | 0.315      | 0.114  | 0.017 | 3.60E-11  | 173981 | 0.317 | 0.034     | 0.034  | 0.315 | 16551  |       |       |       |
| rs886997        | T               | C      | 0.093      | -0.346 | 0.029 | 2.98E-33  | 173981 | 0.093 | 0.006     | 0.053  | 0.908 | 16551  |       |       |       |
| rs9258506       | T               | C      | 0.040      | -0.374 | 0.039 | 7.90E-22  | 173981 | 0.037 | -0.047    | 0.081  | 0.563 | 16551  |       |       |       |
| rs9261659       | G               | A      | 0.109      | -0.161 | 0.027 | 4.74E-09  | 173981 | 0.112 | 0.014     | 0.050  | 0.777 | 16551  |       |       |       |
| rs9263827       | T               | C      | 0.044      | 0.724  | 0.033 | 1.13E-104 | 173981 | 0.051 | 0.035     | 0.070  | 0.618 | 16551  |       |       |       |
| rs9267808       | A               | G      | 0.013      | 1.421  | 0.042 | 1.00E-200 | 173981 | 0.016 | -0.061    | 0.119  | 0.610 | 16551  |       |       |       |
| rs9277195       | C               | T      | 0.492      | -0.326 | 0.015 | 2.29E-101 | 173981 | 0.506 | 0.036     | 0.031  | 0.244 | 16551  |       |       |       |
| rs9277990       | G               | A      | 0.190      | 0.180  | 0.023 | 7.88E-15  | 173981 | 0.187 | 0.024     | 0.040  | 0.542 | 16551  |       |       |       |
| rs9295661       | C               | A      | 0.087      | 0.282  | 0.030 | 7.52E-21  | 173981 | 0.087 | -0.068    | 0.054  | 0.212 | 16551  |       |       |       |
| rs9366637       | T               | C      | 0.052      | -0.182 | 0.027 | 1.06E-11  | 173981 | 0.054 | 0.064     | 0.069  | 0.351 | 16551  |       |       |       |
| rs9380293       | T               | C      | 0.016      | -0.774 | 0.057 | 1.94E-41  | 173981 | 0.016 | 0.083     | 0.122  | 0.497 | 16551  |       |       |       |
| rs9405008       | G               | A      | 0.038      | -0.238 | 0.041 | 5.31E-09  | 173981 | 0.034 | 0.047     | 0.084  | 0.581 | 16551  |       |       |       |
| rs9461389       | A               | G      | 0.108      | -0.161 | 0.022 | 1.68E-13  | 173981 | 0.107 | -0.043    | 0.050  | 0.391 | 16551  |       |       |       |
| rs9517712       | T               | C      | 0.246      | 0.096  | 0.016 | 4.26E-09  | 173981 | 0.251 | -0.002    | 0.035  | 0.964 | 16551  |       |       |       |
| rs9911533       | C               | T      | 0.371      | -0.087 | 0.015 | 5.14E-09  | 173981 | 0.365 | 0.024     | 0.032  | 0.457 | 16551  |       |       |       |
| rs9976073       | C               | T      | 0.262      | -0.094 | 0.017 | 1.13E-08  | 173981 | 0.261 | -0.012    | 0.035  | 0.736 | 16551  |       |       |       |
| rs1004707       | T               | C      | 0.225      | 0.107  | 0.019 | 4.31E-08  | 173981 | 0.223 | 0.022     | 0.056  | 0.699 | 15815  |       |       |       |
| rs10214237      | C               | T      | 0.274      | -0.107 | 0.016 | 2.32E-11  | 173981 | 0.273 | -0.038    | 0.052  | 0.463 | 15815  |       |       |       |
| rs1022674       | C               | A      | 0.226      | 0.107  | 0.017 | 4.61E-10  | 173981 | 0.243 | -0.028    | 0.054  | 0.613 | 15815  |       |       |       |
| rs1048055       | A               | C      | 0.340      | -0.110 | 0.016 | 1.03E-11  | 173981 | 0.337 | -0.040    | 0.049  | 0.414 | 15815  |       |       |       |
| rs1063478       | T               | C      | 0.120      | -0.365 | 0.024 | 3.15E-51  | 173981 | 0.121 | -0.044    | 0.070  | 0.528 | 15815  |       |       |       |
| rs11085728      | T               | C      | 0.294      | -0.126 | 0.017 | 5.86E-14  | 173981 | 0.294 | 0.128     | 0.051  | 0.012 | 15815  |       |       |       |
| rs11552144      | G               | A      | 0.042      | -0.328 | 0.039 | 4.97E-17  | 173981 | 0.039 | -0.204    | 0.124  | 0.101 | 15815  |       |       |       |
| rs11203203      | A               | G      | 0.365      | 0.129  | 0.015 | 3.25E-17  | 173981 | 0.365 | 0.019     | 0.048  | 0.696 | 15815  |       |       |       |
| rs113019108     | T               | C      | 0.019      | -0.544 | 0.055 | 5.03E-23  | 173981 | 0.017 | -0.410    | 0.183  | 0.025 | 15815  |       |       |       |
| rs114898531     | G               | A      | 0.049      | -0.211 | 0.035 | 9.03E-10  | 173981 | 0.047 | -0.156    | 0.110  | 0.158 | 15815  |       |       |       |
| rs115018313     | C               | T      | 0.020      | 1.496  | 0.036 | 1.00E-200 | 173981 | 0.022 | -0.119    | 0.158  | 0.451 | 15815  |       |       |       |
| rs115075841     | T               | C      | 0.072      | -0.560 | 0.044 | 5.79E-38  | 173981 | 0.073 | -0.016    | 0.089  | 0.855 | 15815  |       |       |       |
| rs115256213     | G               | A      | 0.013      | -0.586 | 0.090 | 6.60E-11  | 173981 | 0.014 | -0.121    | 0.206  | 0.559 | 15815  |       |       |       |
| rs115892333     | A               | G      | 0.056      | -0.583 | 0.041 | 7.37E-45  | 173981 | 0.059 | -0.072    | 0.101  | 0.475 | 15815  |       |       |       |
| rs11651753      | T               | C      | 0.428      | -0.093 | 0.015 | 3.24E-10  | 173981 | 0.427 | -0.006    | 0.047  | 0.892 | 15815  |       |       |       |
| rs118124843     | T               | C      | 0.017      | -0.372 | 0.063 | 3.36E-09  | 173981 | 0.016 | 0.053     | 0.181  | 0.771 | 15815  |       |       |       |
| rs11978267      | G               | A      | 0.282      | -0.089 | 0.016 | 3.10E-08  | 173981 | 0.275 | 0.004     | 0.052  | 0.931 | 15815  |       |       |       |
| rs12130424      | C               | T      | 0.073      | 0.166  | 0.026 | 2.12E-10  | 173981 | 0.080 | 0.025     | 0.086  | 0.774 | 15815  |       |       |       |
| rs12175489      | A               | G      | 0.123      | -0.354 | 0.022 | 2.09E-58  | 173981 | 0.123 | -0.068    | 0.073  | 0.347 | 15815  |       |       |       |
| rs12192673      | G               | T      | 0.046      | -0.372 | 0.033 | 5.93E-30  | 173981 | 0.041 | -0.190    | 0.120  | 0.113 | 15815  |       |       |       |
| rs12207915      | C               | T      | 0.057      | -0.361 | 0.031 | 1.01E-30  | 173981 | 0.054 | 0.004     | 0.103  | 0.971 | 15815  |       |       |       |
| rs12215593      | G               | A      | 0.367      | -0.158 | 0.016 | 3.37E-24  | 173981 | 0.360 | 0.009     | 0.049  | 0.846 | 15815  |       |       |       |
| rs1233478       | T               | G      | 0.192      | 0.405  | 0.018 | 1.44E-108 | 173981 | 0.199 | 0.086     | 0.058  | 0.136 | 15815  |       |       |       |
| rs12506688      | T               | C      | 0.300      | 0.101  | 0.016 | 1.44E-10  | 173981 | 0.303 | -0.003    | 0.050  | 0.951 | 15815  |       |       |       |
| rs12828640      | A               | G      | 0.416      | 0.104  | 0.015 | 2.80E-12  | 173981 | 0.418 | -0.027    | 0.048  | 0.580 | 15815  |       |       |       |
| rs12927355      | T               | C      | 0.323      | -0.155 | 0.016 | 7.29E-23  | 173981 | 0.324 | -0.020    | 0.050  | 0.693 | 15815  |       |       |       |

|             |   |   |       |        |       |           |        |       |        |       |       |       |
|-------------|---|---|-------|--------|-------|-----------|--------|-------|--------|-------|-------|-------|
| rs12979891  | C | T | 0.468 | -0.094 | 0.015 | 2.25E-10  | 173981 | 0.464 | 0.081  | 0.047 | 0.083 | 15815 |
| rs13212534  | A | G | 0.093 | 0.313  | 0.029 | 4.27E-27  | 173981 | 0.098 | 0.176  | 0.077 | 0.022 | 15815 |
| rs144536316 | A | G | 0.016 | 0.452  | 0.055 | 3.40E-16  | 173981 | 0.015 | -0.277 | 0.197 | 0.159 | 15815 |
| rs151233    | T | C | 0.131 | 0.164  | 0.024 | 7.46E-12  | 173981 | 0.130 | 0.001  | 0.069 | 0.986 | 15815 |
| rs156743    | C | T | 0.147 | 0.413  | 0.022 | 2.48E-77  | 173981 | 0.149 | 0.079  | 0.065 | 0.223 | 15815 |
| rs1574285   | G | T | 0.408 | 0.103  | 0.015 | 1.69E-12  | 173981 | 0.401 | -0.048 | 0.047 | 0.314 | 15815 |
| rs1613191   | A | G | 0.017 | 0.579  | 0.052 | 2.78E-28  | 173981 | 0.017 | 0.324  | 0.188 | 0.084 | 15815 |
| rs1615504   | T | C | 0.472 | 0.103  | 0.015 | 1.22E-12  | 173981 | 0.478 | 0.025  | 0.047 | 0.592 | 15815 |
| rs17179851  | C | T | 0.102 | 0.364  | 0.022 | 2.89E-63  | 173981 | 0.106 | -0.039 | 0.077 | 0.616 | 15815 |
| rs17207622  | T | G | 0.027 | -0.625 | 0.061 | 1.48E-24  | 173981 | 0.026 | -0.185 | 0.142 | 0.193 | 15815 |
| rs17630235  | A | G | 0.409 | 0.191  | 0.015 | 4.14E-38  | 173981 | 0.410 | 0.007  | 0.047 | 0.878 | 15815 |
| rs17652674  | A | C | 0.194 | 0.100  | 0.018 | 2.20E-08  | 173981 | 0.198 | 0.027  | 0.058 | 0.637 | 15815 |
| rs192321865 | T | C | 0.065 | 0.225  | 0.039 | 7.53E-09  | 173981 | 0.061 | -0.107 | 0.099 | 0.278 | 15815 |
| rs1990760   | C | T | 0.395 | -0.119 | 0.015 | 1.83E-15  | 173981 | 0.390 | 0.008  | 0.048 | 0.870 | 15815 |
| rs1994565   | G | T | 0.293 | -0.096 | 0.017 | 1.84E-08  | 173981 | 0.295 | 0.011  | 0.051 | 0.833 | 15815 |
| rs204996    | T | C | 0.057 | -0.969 | 0.058 | 9.32E-62  | 173981 | 0.059 | -0.114 | 0.100 | 0.255 | 15815 |
| rs210211    | G | A | 0.104 | -0.311 | 0.028 | 1.16E-29  | 173981 | 0.103 | 0.043  | 0.076 | 0.568 | 15815 |
| rs2212434   | T | C | 0.458 | 0.080  | 0.015 | 3.54E-08  | 173981 | 0.449 | -0.032 | 0.047 | 0.492 | 15815 |
| rs2289702   | T | C | 0.101 | -0.171 | 0.026 | 7.08E-11  | 173981 | 0.103 | -0.020 | 0.076 | 0.789 | 15815 |
| rs2313430   | C | T | 0.482 | -0.085 | 0.015 | 5.75E-09  | 173981 | 0.482 | -0.004 | 0.046 | 0.924 | 15815 |
| rs2395471   | A | G | 0.355 | -0.519 | 0.017 | 1.00E-200 | 173981 | 0.362 | -0.015 | 0.048 | 0.757 | 15815 |
| rs241435    | A | G | 0.031 | -0.783 | 0.074 | 5.05E-26  | 173981 | 0.031 | -0.018 | 0.137 | 0.892 | 15815 |
| rs2476601   | A | G | 0.094 | 0.544  | 0.022 | 4.54E-135 | 173981 | 0.103 | -0.025 | 0.075 | 0.736 | 15815 |
| rs2499743   | A | C | 0.225 | 0.128  | 0.019 | 1.37E-11  | 173981 | 0.219 | 0.079  | 0.058 | 0.177 | 15815 |
| rs2516698   | A | G | 0.052 | -0.278 | 0.045 | 6.67E-10  | 173981 | 0.053 | -0.025 | 0.105 | 0.813 | 15815 |
| rs2844466   | C | T | 0.360 | 0.487  | 0.015 | 1.00E-200 | 173981 | 0.357 | 0.045  | 0.049 | 0.350 | 15815 |
| rs28746904  | C | T | 0.228 | -0.944 | 0.024 | 1.00E-200 | 173981 | 0.241 | -0.010 | 0.055 | 0.848 | 15815 |
| rs28893513  | G | A | 0.120 | -0.467 | 0.026 | 1.28E-69  | 173981 | 0.124 | -0.013 | 0.071 | 0.857 | 15815 |
| rs3024505   | A | G | 0.159 | -0.124 | 0.021 | 1.80E-09  | 173981 | 0.156 | 0.067  | 0.063 | 0.290 | 15815 |
| rs3087243   | A | G | 0.453 | -0.148 | 0.015 | 3.70E-23  | 173981 | 0.451 | -0.056 | 0.047 | 0.231 | 15815 |
| rs3093971   | A | G | 0.103 | 0.765  | 0.026 | 6.25E-188 | 173981 | 0.104 | -0.132 | 0.076 | 0.080 | 15815 |
| rs3117244   | A | G | 0.127 | -0.609 | 0.024 | 4.59E-142 | 173981 | 0.124 | -0.165 | 0.071 | 0.020 | 15815 |
| rs3130363   | G | A | 0.141 | 0.560  | 0.022 | 3.00E-149 | 173981 | 0.144 | 0.077  | 0.066 | 0.243 | 15815 |
| rs3130666   | A | G | 0.041 | -0.353 | 0.058 | 1.51E-09  | 173981 | 0.043 | -0.130 | 0.115 | 0.260 | 15815 |
| rs3134962   | A | G | 0.169 | 0.686  | 0.021 | 1.00E-200 | 173981 | 0.170 | 0.091  | 0.062 | 0.144 | 15815 |
| rs3184504   | T | C | 0.487 | 0.218  | 0.015 | 4.62E-49  | 173981 | 0.482 | 0.010  | 0.047 | 0.826 | 15815 |
| rs34864796  | A | G | 0.125 | 0.461  | 0.024 | 8.74E-82  | 173981 | 0.125 | 0.122  | 0.069 | 0.080 | 15815 |
| rs36104352  | C | A | 0.123 | -0.155 | 0.025 | 6.17E-10  | 173981 | 0.119 | 0.006  | 0.071 | 0.932 | 15815 |
| rs3763355   | C | T | 0.065 | 0.606  | 0.027 | 4.95E-113 | 173981 | 0.060 | 0.089  | 0.098 | 0.364 | 15815 |
| rs3827505   | C | T | 0.167 | -0.143 | 0.020 | 8.39E-13  | 173981 | 0.167 | -0.064 | 0.062 | 0.301 | 15815 |
| rs41265836  | G | A | 0.046 | 0.478  | 0.035 | 8.53E-42  | 173981 | 0.045 | 0.144  | 0.115 | 0.213 | 15815 |
| rs41267086  | A | G | 0.049 | -0.277 | 0.035 | 1.54E-15  | 173981 | 0.047 | -0.027 | 0.108 | 0.802 | 15815 |
| rs41268924  | A | G | 0.061 | 0.211  | 0.038 | 1.96E-08  | 173981 | 0.057 | -0.125 | 0.100 | 0.213 | 15815 |
| rs434943    | A | G | 0.331 | -0.099 | 0.017 | 8.22E-09  | 173981 | 0.335 | -0.032 | 0.049 | 0.519 | 15815 |
| rs45485691  | A | G | 0.275 | 0.107  | 0.016 | 5.53E-12  | 173981 | 0.269 | 0.043  | 0.052 | 0.413 | 15815 |
| rs4804000   | A | G | 0.188 | -0.131 | 0.019 | 1.27E-11  | 173981 | 0.191 | 0.004  | 0.059 | 0.943 | 15815 |
| rs4947258   | G | A | 0.121 | 0.705  | 0.023 | 1.00E-200 | 173981 | 0.122 | 0.079  | 0.071 | 0.269 | 15815 |
| rs537544    | C | T | 0.384 | 0.087  | 0.015 | 8.37E-09  | 173981 | 0.375 | 0.007  | 0.048 | 0.880 | 15815 |
| rs542907    | A | G | 0.439 | -0.081 | 0.015 | 3.96E-08  | 173981 | 0.445 | -0.025 | 0.047 | 0.586 | 15815 |
| rs55844831  | G | A | 0.041 | 0.588  | 0.031 | 3.09E-82  | 173981 | 0.038 | -0.045 | 0.121 | 0.708 | 15815 |
| rs56100858  | T | C | 0.011 | 0.728  | 0.047 | 2.92E-55  | 173981 | 0.013 | -0.026 | 0.198 | 0.894 | 15815 |
| rs56111713  | T | G | 0.008 | 0.493  | 0.081 | 9.84E-10  | 173981 | 0.008 | 0.156  | 0.270 | 0.564 | 15815 |
| rs56302826  | G | T | 0.032 | -0.403 | 0.046 | 1.82E-18  | 173981 | 0.031 | -0.195 | 0.136 | 0.151 | 15815 |
| rs5763842   | A | G | 0.383 | 0.150  | 0.015 | 1.49E-23  | 173981 | 0.396 | 0.043  | 0.048 | 0.364 | 15815 |
| rs58223158  | G | A | 0.034 | 0.329  | 0.038 | 3.48E-18  | 173981 | 0.037 | 0.222  | 0.123 | 0.072 | 15815 |
| rs6000602   | A | C | 0.237 | 0.102  | 0.018 | 6.16E-09  | 173981 | 0.230 | -0.002 | 0.054 | 0.967 | 15815 |
| rs60888743  | G | A | 0.252 | -0.137 | 0.017 | 9.82E-16  | 173981 | 0.264 | 0.061  | 0.053 | 0.247 | 15815 |
| rs61839660  | T | C | 0.102 | -0.371 | 0.031 | 3.49E-32  | 173981 | 0.097 | -0.013 | 0.080 | 0.868 | 15815 |
| rs62397629  | A | C | 0.052 | -0.217 | 0.034 | 1.31E-10  | 173981 | 0.053 | -0.233 | 0.105 | 0.026 | 15815 |
| rs62407529  | T | C | 0.060 | -0.344 | 0.036 | 1.12E-21  | 173981 | 0.053 | 0.139  | 0.106 | 0.189 | 15815 |
| rs62621992  | T | C | 0.016 | 0.675  | 0.055 | 1.21E-34  | 173981 | 0.018 | 0.222  | 0.178 | 0.213 | 15815 |
| rs6457109   | C | T | 0.090 | 0.173  | 0.023 | 4.41E-14  | 173981 | 0.094 | -0.063 | 0.080 | 0.436 | 15815 |
| rs6489856   | A | C | 0.309 | 0.112  | 0.016 | 2.54E-12  | 173981 | 0.306 | -0.090 | 0.051 | 0.076 | 15815 |
| rs6912701   | T | C | 0.012 | -0.518 | 0.075 | 4.67E-12  | 173981 | 0.014 | 0.007  | 0.194 | 0.971 | 15815 |
| rs6913182   | T | C | 0.170 | -0.921 | 0.029 | 1.00E-200 | 173981 | 0.173 | -0.136 | 0.062 | 0.030 | 15815 |
| rs705704    | A | G | 0.339 | 0.196  | 0.015 | 1.89E-37  | 173981 | 0.334 | 0.058  | 0.049 | 0.243 | 15815 |
| rs71565365  | A | G | 0.073 | -0.201 | 0.028 | 1.29E-12  | 173981 | 0.077 | 0.073  | 0.086 | 0.396 | 15815 |
| rs7237497   | T | C | 0.165 | 0.177  | 0.020 | 1.17E-18  | 173981 | 0.164 | 0.163  | 0.063 | 0.010 | 15815 |
| rs73069541  | G | A | 0.236 | -0.107 | 0.018 | 3.07E-09  | 173981 | 0.237 | 0.027  | 0.055 | 0.627 | 15815 |
| rs73391152  | T | G | 0.055 | -0.209 | 0.038 | 3.27E-08  | 173981 | 0.056 | 0.067  | 0.101 | 0.506 | 15815 |
| rs73396583  | C | T | 0.102 | -0.296 | 0.031 | 1.80E-21  | 173981 | 0.105 | 0.035  | 0.075 | 0.647 | 15815 |
| rs73400833  | T | C | 0.020 | -0.658 | 0.050 | 1.02E-39  | 173981 | 0.024 | -0.140 | 0.149 | 0.349 | 15815 |
| rs74969061  | A | G | 0.020 | -0.286 | 0.049 | 7.29E-09  | 173981 | 0.023 | 0.020  | 0.156 | 0.896 | 15815 |
| rs75545083  | T | C | 0.053 | -0.267 | 0.041 | 6.14E-11  | 173981 | 0.057 | -0.120 | 0.102 | 0.239 | 15815 |
| rs77154676  | C | T | 0.171 | -0.134 | 0.023 | 6.60E-09  | 173981 | 0.171 | -0.020 | 0.062 | 0.743 | 15815 |
| rs773560    | A | G | 0.270 | 0.148  | 0.016 | 3.13E-19  | 173981 | 0.277 | -0.031 | 0.051 | 0.550 | 15815 |
| rs7755997   | G | A | 0.412 | 0.221  | 0.015 | 2.87E-51  | 173981 | 0.409 | 0.009  | 0.047 | 0.841 | 15815 |
| rs7772373   | G | A | 0.077 | -0.406 | 0.042 | 1.44E-22  | 173981 | 0.074 | 0.071  | 0.088 | 0.423 | 15815 |
| rs78354120  | T | C | 0.014 | -0.429 | 0.071 | 1.16E-09  | 173981 | 0.014 | 0.227  | 0.197 | 0.248 | 15815 |
| rs8011031   | G | A | 0.276 | 0.090  | 0.015 | 5.95E-09  | 173981 | 0.280 | 0.087  | 0.052 | 0.096 | 15815 |
| rs8013873   | T | C | 0.185 | -0.163 | 0.023 | 4.77E-13  | 173981 | 0.182 | -0.028 | 0.061 | 0.640 | 15815 |
| rs8062123   | T | G | 0.315 | 0.114  | 0.017 | 3.60E-11  | 173981 | 0.317 | 0.125  | 0.051 | 0.014 | 15815 |
| rs886997    | T | C | 0.093 | -0.346 | 0.029 | 2.98E-33  | 173981 | 0.093 | -0.009 | 0.080 | 0.909 | 15815 |
| rs9258506   | T | C | 0.040 | -0.374 | 0.039 | 7.90E-22  | 173981 | 0.037 | -0.218 | 0.122 | 0.075 | 15815 |
| rs9261659   | G | A | 0.109 | -0.161 | 0.027 | 4.74E-09  | 173981 | 0.111 | -0.049 | 0.075 | 0.511 | 15815 |
| rs9263827   | T | C | 0.044 | 0.724  | 0.033 | 1.13E-104 | 173981 | 0.051 | -0.061 | 0.105 | 0.562 | 15815 |
| rs9267808   | A | G | 0.013 | 1.421  | 0.042 | 1.00E-200 | 173981 | 0.016 | -0.185 | 0.175 | 0.289 | 15815 |
| rs9277195   | C | T | 0.492 | -0.326 | 0.015 | 2.29E-101 | 173981 | 0.506 | 0.048  | 0.047 | 0.305 | 15815 |
| rs9277990   | G | A | 0.190 | 0.180  | 0.023 | 7.88E-15  | 173981 | 0.188 | 0.052  | 0.060 | 0.385 | 15815 |
| rs9295661   | C | A | 0.087 | 0.282  | 0.030 | 7.52E-21  | 173981 | 0.087 | 0.093  | 0.081 | 0.252 | 15815 |
| rs9366637   | T | C | 0.052 | -0.182 | 0.027 | 1.06E-11  | 173981 | 0.054 | 0.038  | 0.105 | 0.717 | 15815 |
| rs9380293   | T | C | 0.016 | -0.774 | 0.057 | 1.94E-41  | 173981 | 0.017 | -0.049 | 0.183 | 0.787 | 15815 |

|                 |                |        |             |        |       |          |        |       |           |        |       |        |       |       |       |
|-----------------|----------------|--------|-------------|--------|-------|----------|--------|-------|-----------|--------|-------|--------|-------|-------|-------|
| type 1 diabetes | COVID-19 death | 201.15 | rs9405008   | G      | A     | 0.038    | -0.238 | 0.041 | 5.31E-09  | 173981 | 0.034 | 0.069  | 0.130 | 0.593 | 15815 |
|                 |                |        | rs9461389   | A      | G     | 0.108    | -0.161 | 0.022 | 1.68E-13  | 173981 | 0.107 | 0.067  | 0.076 | 0.375 | 15815 |
|                 |                |        | rs9517712   | T      | C     | 0.246    | 0.096  | 0.016 | 4.26E-09  | 173981 | 0.251 | 0.014  | 0.053 | 0.798 | 15815 |
|                 |                |        | rs9911533   | C      | T     | 0.371    | -0.087 | 0.015 | 5.14E-09  | 173981 | 0.365 | 0.019  | 0.048 | 0.686 | 15815 |
|                 |                |        | rs9976073   | C      | T     | 0.262    | -0.094 | 0.017 | 1.13E-08  | 173981 | 0.261 | -0.019 | 0.053 | 0.726 | 15815 |
|                 |                |        | rs1004707   | T      | C     | 0.225    | 0.107  | 0.019 | 4.31E-08  | 173981 | 0.223 | 0.041  | 0.059 | 0.483 | 15815 |
|                 |                |        | rs10214237  | C      | T     | 0.274    | -0.107 | 0.016 | 2.32E-11  | 173981 | 0.273 | -0.057 | 0.055 | 0.296 | 15815 |
|                 |                |        | rs1022674   | C      | A     | 0.226    | 0.107  | 0.017 | 4.61E-10  | 173981 | 0.243 | -0.015 | 0.057 | 0.788 | 15815 |
|                 |                |        | rs1048055   | A      | C     | 0.340    | -0.110 | 0.016 | 1.03E-11  | 173981 | 0.337 | -0.034 | 0.052 | 0.510 | 15815 |
|                 |                |        | rs1063478   | T      | C     | 0.120    | -0.365 | 0.024 | 3.15E-51  | 173981 | 0.121 | -0.007 | 0.074 | 0.921 | 15815 |
|                 |                |        | rs11085725  | T      | C     | 0.294    | -0.126 | 0.017 | 5.86E-14  | 173981 | 0.294 | 0.112  | 0.054 | 0.038 | 15815 |
|                 |                |        | rs111552148 | G      | A     | 0.042    | -0.328 | 0.039 | 4.97E-17  | 173981 | 0.039 | -0.187 | 0.131 | 0.154 | 15815 |
|                 |                |        | rs11203203  | A      | G     | 0.365    | 0.129  | 0.015 | 3.25E-17  | 173981 | 0.365 | 0.013  | 0.051 | 0.794 | 15815 |
|                 |                |        | rs113019108 | T      | C     | 0.019    | -0.544 | 0.055 | 5.03E-23  | 173981 | 0.017 | -0.387 | 0.194 | 0.046 | 15815 |
|                 |                |        | rs114898531 | G      | A     | 0.049    | -0.211 | 0.035 | 9.03E-10  | 173981 | 0.047 | -0.138 | 0.116 | 0.235 | 15815 |
|                 |                |        | rs115018313 | C      | T     | 0.020    | 1.496  | 0.036 | 1.00E-200 | 173981 | 0.022 | -0.131 | 0.166 | 0.429 | 15815 |
|                 |                |        | rs115075841 | T      | C     | 0.072    | -0.560 | 0.044 | 5.79E-38  | 173981 | 0.073 | -0.004 | 0.094 | 0.970 | 15815 |
|                 |                |        | rs115256213 | G      | A     | 0.013    | -0.586 | 0.090 | 6.60E-11  | 173981 | 0.014 | 0.104  | 0.219 | 0.633 | 15815 |
|                 |                |        | rs115892333 | A      | G     | 0.056    | -0.583 | 0.041 | 7.37E-45  | 173981 | 0.059 | -0.145 | 0.106 | 0.173 | 15815 |
|                 |                |        | rs11651753  | T      | C     | 0.428    | -0.093 | 0.015 | 3.24E-10  | 173981 | 0.427 | -0.009 | 0.049 | 0.851 | 15815 |
|                 |                |        | rs118124843 | T      | C     | 0.017    | -0.372 | 0.063 | 3.36E-09  | 173981 | 0.016 | 0.055  | 0.190 | 0.773 | 15815 |
|                 |                |        | rs11978267  | G      | A     | 0.282    | -0.089 | 0.016 | 3.10E-08  | 173981 | 0.275 | 0.033  | 0.054 | 0.550 | 15815 |
|                 |                |        | rs12130424  | C      | T     | 0.073    | 0.166  | 0.026 | 2.12E-10  | 173981 | 0.080 | -0.005 | 0.091 | 0.959 | 15815 |
|                 |                |        | rs12175489  | A      | G     | 0.123    | -0.354 | 0.022 | 2.09E-58  | 173981 | 0.123 | -0.065 | 0.077 | 0.397 | 15815 |
|                 |                |        | rs12192673  | G      | T     | 0.046    | -0.372 | 0.033 | 5.93E-30  | 173981 | 0.041 | -0.159 | 0.126 | 0.207 | 15815 |
|                 |                |        | rs12207915  | C      | T     | 0.057    | -0.361 | 0.031 | 1.01E-30  | 173981 | 0.054 | -0.017 | 0.109 | 0.878 | 15815 |
|                 |                |        | rs12215593  | G      | A     | 0.367    | -0.158 | 0.016 | 3.37E-24  | 173981 | 0.360 | 0.024  | 0.052 | 0.645 | 15815 |
|                 |                |        | rs1233478   | T      | G     | 0.192    | 0.405  | 0.018 | 1.44E-108 | 173981 | 0.199 | 0.098  | 0.061 | 0.108 | 15815 |
|                 |                |        | rs12506688  | T      | C     | 0.300    | 0.101  | 0.016 | 1.44E-10  | 173981 | 0.303 | -0.006 | 0.053 | 0.904 | 15815 |
|                 |                |        | rs12828640  | A      | G     | 0.416    | 0.104  | 0.015 | 2.80E-12  | 173981 | 0.418 | -0.010 | 0.051 | 0.836 | 15815 |
|                 |                |        | rs12927355  | T      | C     | 0.323    | -0.155 | 0.016 | 7.29E-23  | 173981 | 0.324 | -0.023 | 0.053 | 0.657 | 15815 |
|                 |                |        | rs12979891  | C      | T     | 0.468    | -0.094 | 0.015 | 2.25E-10  | 173981 | 0.464 | 0.063  | 0.050 | 0.202 | 15815 |
|                 |                |        | rs13212534  | A      | G     | 0.093    | 0.313  | 0.029 | 4.27E-27  | 173981 | 0.098 | 0.240  | 0.081 | 0.003 | 15815 |
|                 |                |        | rs144536316 | A      | G     | 0.016    | 0.452  | 0.055 | 3.40E-16  | 173981 | 0.015 | -0.319 | 0.207 | 0.124 | 15815 |
|                 |                |        | rs151233    | T      | C     | 0.131    | 0.164  | 0.024 | 7.46E-12  | 173981 | 0.130 | 0.006  | 0.073 | 0.932 | 15815 |
|                 |                |        | rs156743    | C      | T     | 0.147    | 0.413  | 0.022 | 2.48E-77  | 173981 | 0.149 | 0.090  | 0.069 | 0.189 | 15815 |
|                 |                |        | rs1574285   | G      | T     | 0.408    | 0.103  | 0.015 | 1.69E-12  | 173981 | 0.401 | -0.034 | 0.050 | 0.503 | 15815 |
|                 |                |        | rs1613191   | A      | G     | 0.017    | 0.579  | 0.052 | 2.78E-28  | 173981 | 0.017 | 0.321  | 0.199 | 0.107 | 15815 |
|                 |                |        | rs1615504   | T      | C     | 0.472    | 0.103  | 0.015 | 1.22E-12  | 173981 | 0.478 | 0.037  | 0.050 | 0.457 | 15815 |
|                 |                |        | rs17179851  | C      | T     | 0.102    | 0.364  | 0.022 | 2.89E-63  | 173981 | 0.106 | -0.022 | 0.082 | 0.787 | 15815 |
|                 |                |        | rs17207622  | T      | G     | 0.027    | -0.625 | 0.061 | 1.48E-24  | 173981 | 0.026 | -0.157 | 0.150 | 0.296 | 15815 |
|                 |                |        | rs17630235  | A      | G     | 0.409    | 0.191  | 0.015 | 4.14E-38  | 173981 | 0.410 | 0.024  | 0.050 | 0.637 | 15815 |
|                 |                |        | rs17652674  | A      | C     | 0.194    | 0.100  | 0.018 | 2.20E-08  | 173981 | 0.198 | 0.016  | 0.061 | 0.791 | 15815 |
|                 |                |        | rs192321865 | T      | C     | 0.065    | 0.225  | 0.039 | 7.53E-09  | 173981 | 0.061 | -0.092 | 0.104 | 0.379 | 15815 |
|                 |                |        | rs1990760   | C      | T     | 0.395    | -0.119 | 0.015 | 1.83E-15  | 173981 | 0.390 | -0.016 | 0.051 | 0.759 | 15815 |
|                 |                |        | rs1994565   | G      | T     | 0.293    | -0.096 | 0.017 | 1.84E-08  | 173981 | 0.295 | 0.020  | 0.054 | 0.703 | 15815 |
|                 |                |        | rs204996    | T      | C     | 0.057    | -0.969 | 0.058 | 9.32E-62  | 173981 | 0.059 | -0.069 | 0.105 | 0.510 | 15815 |
|                 |                |        | rs210211    | G      | A     | 0.104    | -0.311 | 0.028 | 1.16E-29  | 173981 | 0.103 | 0.055  | 0.080 | 0.496 | 15815 |
|                 |                |        | rs2212434   | T      | C     | 0.458    | 0.080  | 0.015 | 3.54E-08  | 173981 | 0.449 | -0.023 | 0.049 | 0.636 | 15815 |
|                 |                |        | rs2289702   | T      | C     | 0.101    | -0.171 | 0.026 | 7.08E-11  | 173981 | 0.103 | -0.026 | 0.080 | 0.749 | 15815 |
|                 |                |        | rs2313430   | C      | T     | 0.482    | -0.085 | 0.015 | 5.75E-09  | 173981 | 0.482 | 0.004  | 0.049 | 0.930 | 15815 |
|                 |                |        | rs2395471   | A      | G     | 0.355    | -0.519 | 0.017 | 1.00E-200 | 173981 | 0.362 | 0.006  | 0.051 | 0.910 | 15815 |
|                 |                |        | rs241435    | A      | G     | 0.031    | -0.783 | 0.074 | 5.05E-26  | 173981 | 0.031 | -0.018 | 0.144 | 0.899 | 15815 |
|                 |                |        | rs2476601   | A      | G     | 0.094    | 0.544  | 0.022 | 4.54E-135 | 173981 | 0.103 | 0.015  | 0.079 | 0.855 | 15815 |
|                 |                |        | rs2499743   | A      | C     | 0.225    | 0.128  | 0.019 | 1.37E-11  | 173981 | 0.219 | 0.089  | 0.062 | 0.148 | 15815 |
|                 |                |        | rs2516698   | A      | G     | 0.052    | -0.278 | 0.045 | 6.67E-10  | 173981 | 0.053 | -0.005 | 0.111 | 0.967 | 15815 |
|                 |                |        | rs2844466   | C      | T     | 0.360    | 0.487  | 0.015 | 1.00E-200 | 173981 | 0.357 | 0.040  | 0.051 | 0.431 | 15815 |
|                 |                |        | rs28746904  | C      | T     | 0.228    | -0.944 | 0.024 | 1.00E-200 | 173981 | 0.241 | -0.005 | 0.058 | 0.931 | 15815 |
|                 |                |        | rs28893513  | G      | A     | 0.120    | -0.467 | 0.026 | 1.28E-69  | 173981 | 0.124 | 0.007  | 0.075 | 0.928 | 15815 |
|                 |                |        | rs3024505   | A      | G     | 0.159    | -0.124 | 0.021 | 1.80E-09  | 173981 | 0.156 | 0.108  | 0.067 | 0.106 | 15815 |
|                 |                |        | rs3087243   | A      | G     | 0.453    | -0.148 | 0.015 | 3.70E-23  | 173981 | 0.451 | -0.063 | 0.049 | 0.203 | 15815 |
|                 |                |        | rs3093971   | A      | G     | 0.103    | 0.765  | 0.026 | 6.25E-188 | 173981 | 0.104 | -0.111 | 0.080 | 0.165 | 15815 |
|                 |                |        | rs3117244   | A      | G     | 0.127    | -0.609 | 0.024 | 4.59E-142 | 173981 | 0.124 | -0.149 | 0.075 | 0.047 | 15815 |
|                 |                |        | rs3130363   | G      | A     | 0.141    | 0.560  | 0.022 | 3.00E-149 | 173981 | 0.144 | 0.077  | 0.069 | 0.268 | 15815 |
|                 |                |        | rs3130666   | A      | G     | 0.041    | -0.353 | 0.058 | 1.51E-09  | 173981 | 0.043 | -0.086 | 0.121 | 0.477 | 15815 |
|                 |                |        | rs3134962   | A      | G     | 0.169    | 0.686  | 0.021 | 1.00E-200 | 173981 | 0.170 | 0.083  | 0.066 | 0.207 | 15815 |
|                 |                |        | rs3184504   | T      | C     | 0.487    | 0.218  | 0.015 | 4.62E-49  | 173981 | 0.482 | 0.033  | 0.049 | 0.504 | 15815 |
|                 |                |        | rs34864796  | A      | G     | 0.125    | 0.461  | 0.024 | 8.74E-82  | 173981 | 0.125 | 0.139  | 0.073 | 0.057 | 15815 |
|                 |                |        | rs36104352  | C      | A     | 0.123    | -0.155 | 0.025 | 6.17E-10  | 173981 | 0.119 | -0.021 | 0.075 | 0.783 | 15815 |
|                 |                |        | rs3763355   | C      | T     | 0.065    | 0.606  | 0.027 | 4.95E-113 | 173981 | 0.060 | 0.133  | 0.103 | 0.199 | 15815 |
|                 |                |        | rs3827505   | C      | T     | 0.167    | -0.143 | 0.020 | 8.39E-13  | 173981 | 0.167 | -0.112 | 0.066 | 0.089 | 15815 |
|                 |                |        | rs41265836  | G      | A     | 0.046    | 0.478  | 0.035 | 8.53E-42  | 173981 | 0.045 | 0.157  | 0.122 | 0.199 | 15815 |
|                 |                |        | rs41267086  | A      | G     | 0.049    | -0.277 | 0.035 | 1.54E-15  | 173981 | 0.047 | -0.002 | 0.114 | 0.986 | 15815 |
|                 |                |        | rs41268924  | A      | G     | 0.061    | 0.211  | 0.038 | 1.96E-08  | 173981 | 0.057 | -0.140 | 0.105 | 0.184 | 15815 |
|                 |                |        | rs434943    | A      | G     | 0.331    | -0.099 | 0.017 | 8.22E-09  | 173981 | 0.335 | -0.045 | 0.052 | 0.387 | 15815 |
|                 |                |        | rs45485691  | A      | G     | 0.275    | 0.107  | 0.016 | 5.53E-12  | 173981 | 0.269 | 0.048  | 0.055 | 0.383 | 15815 |
|                 |                |        | rs4804000   | A      | G     | 0.188    | -0.131 | 0.019 | 1.27E-11  | 173981 | 0.191 | 0.002  | 0.062 | 0.977 | 15815 |
|                 |                |        | rs4947258   | G      | A     | 0.121    | 0.705  | 0.023 | 1.00E-200 | 173981 | 0.122 | 0.068  | 0.075 | 0.362 | 15815 |
|                 |                |        | rs537544    | C      | T     | 0.384    | 0.087  | 0.015 | 8.37E-09  | 173981 | 0.375 | -0.040 | 0.051 | 0.434 | 15815 |
| rs542907        | A              | G      | 0.439       | -0.081 | 0.015 | 3.96E-08 | 173981 | 0.445 | -0.033    | 0.049  | 0.498 | 15815  |       |       |       |
| rs55844831      | G              | A      | 0.041       | 0.588  | 0.031 | 3.09E-82 | 173981 | 0.038 | -0.057    | 0.127  | 0.655 | 15815  |       |       |       |
| rs56100858      | T              | C      | 0.011       | 0.728  | 0.047 | 2.92E-55 | 173981 | 0.013 | -0.064    | 0.209  | 0.758 | 15815  |       |       |       |
| rs56111713      | T              | G      | 0.008       | 0.493  | 0.081 | 9.84E-10 | 173981 | 0.008 | 0.093     | 0.286  | 0.746 | 15815  |       |       |       |
| rs56302826      | G              | T      | 0.032       | -0.403 | 0.046 | 1.82E-18 | 173981 | 0.031 | -0.161    | 0.143  | 0.261 | 15815  |       |       |       |
| rs5763842       | A              | G      | 0.383       | 0.150  | 0.015 | 1.49E-23 | 173981 | 0.396 | 0.049     | 0.050  | 0.335 | 15815  |       |       |       |
| rs58223158      | G              | A      | 0.034       | 0.329  | 0.038 | 3.48E-18 | 173981 | 0.037 | 0.212     | 0.130  | 0.104 | 15815  |       |       |       |
| rs6000602       | A              | C      | 0.237       | 0.102  | 0.018 | 6.16E-09 | 173981 | 0.230 | 0.028     | 0.057  | 0.630 | 15815  |       |       |       |
| rs60888743      | G              | A      | 0.252       | -0.137 | 0.017 | 9.82E-16 | 173981 | 0.264 | 0.085     | 0.055  | 0.125 | 15815  |       |       |       |
| rs61839660      | T              | C      | 0.102       | -0.371 | 0.031 | 3.49E-32 | 173981 | 0.097 | 0.002     | 0.084  | 0.983 | 15815  |       |       |       |
| rs62397629      | A              | C      | 0.052       | -0.217 | 0.034 | 1.31E-10 | 173981 | 0.053 | -0.225    | 0.111  | 0.042 | 15815  |       |       |       |
| rs62407529      | T              | C      | 0.060       | -0.344 | 0.036 | 1.12E-21 | 173981 | 0.053 | 0.140     | 0.112  | 0.211 | 15815  |       |       |       |
| rs62621992      | T              | C      | 0.016       | 0.675  | 0.055 | 1.21E-34 | 173981 | 0.018 | 0.268     | 0.189  | 0.157 | 15815  |       |       |       |

|                                              |        |             |   |   |       |        |       |           |        |       |        |       |       |       |
|----------------------------------------------|--------|-------------|---|---|-------|--------|-------|-----------|--------|-------|--------|-------|-------|-------|
| type 1 diabetes 'ecoverly time with colchici | 159.80 | rs6457109   | C | T | 0.090 | 0.173  | 0.023 | 4.41E-14  | 173981 | 0.094 | -0.058 | 0.085 | 0.496 | 15815 |
|                                              |        | rs6489856   | A | C | 0.309 | 0.112  | 0.016 | 2.54E-12  | 173981 | 0.306 | -0.077 | 0.053 | 0.146 | 15815 |
|                                              |        | rs6912701   | T | C | 0.012 | -0.518 | 0.075 | 4.67E-12  | 173981 | 0.014 | 0.010  | 0.206 | 0.961 | 15815 |
|                                              |        | rs6913182   | T | C | 0.170 | -0.921 | 0.029 | 1.00E-200 | 173981 | 0.173 | -0.137 | 0.066 | 0.038 | 15815 |
|                                              |        | rs705704    | A | G | 0.339 | 0.196  | 0.015 | 1.89E-37  | 173981 | 0.334 | 0.079  | 0.052 | 0.130 | 15815 |
|                                              |        | rs71565365  | A | G | 0.073 | -0.201 | 0.028 | 1.29E-12  | 173981 | 0.077 | 0.084  | 0.090 | 0.351 | 15815 |
|                                              |        | rs7237497   | T | C | 0.165 | 0.177  | 0.020 | 1.17E-18  | 173981 | 0.164 | 0.188  | 0.067 | 0.005 | 15815 |
|                                              |        | rs73069541  | G | A | 0.236 | -0.107 | 0.018 | 3.07E-09  | 173981 | 0.237 | 0.041  | 0.058 | 0.480 | 15815 |
|                                              |        | rs73391152  | T | G | 0.055 | -0.209 | 0.038 | 3.27E-08  | 173981 | 0.056 | 0.081  | 0.106 | 0.445 | 15815 |
|                                              |        | rs73396583  | C | T | 0.102 | -0.296 | 0.031 | 1.80E-21  | 173981 | 0.105 | 0.044  | 0.080 | 0.581 | 15815 |
|                                              |        | rs73400833  | T | C | 0.020 | -0.658 | 0.050 | 1.02E-39  | 173981 | 0.024 | -0.180 | 0.157 | 0.253 | 15815 |
|                                              |        | rs74969061  | A | G | 0.020 | -0.286 | 0.049 | 7.29E-09  | 173981 | 0.023 | 0.007  | 0.165 | 0.966 | 15815 |
|                                              |        | rs75545083  | T | C | 0.053 | -0.267 | 0.041 | 6.14E-11  | 173981 | 0.057 | -0.088 | 0.108 | 0.416 | 15815 |
|                                              |        | rs77154676  | C | T | 0.171 | -0.134 | 0.023 | 6.60E-09  | 173981 | 0.171 | -0.034 | 0.065 | 0.598 | 15815 |
|                                              |        | rs773560    | A | G | 0.270 | 0.148  | 0.016 | 3.13E-19  | 173981 | 0.277 | -0.051 | 0.054 | 0.347 | 15815 |
|                                              |        | rs7755997   | G | A | 0.412 | 0.221  | 0.015 | 2.87E-51  | 173981 | 0.409 | 0.030  | 0.050 | 0.546 | 15815 |
|                                              |        | rs7772373   | G | A | 0.077 | -0.406 | 0.042 | 1.44E-22  | 173981 | 0.074 | 0.043  | 0.093 | 0.644 | 15815 |
|                                              |        | rs78354120  | T | C | 0.014 | -0.429 | 0.071 | 1.16E-09  | 173981 | 0.014 | 0.227  | 0.207 | 0.273 | 15815 |
|                                              |        | rs8011031   | G | A | 0.276 | 0.090  | 0.015 | 5.95E-09  | 173981 | 0.280 | 0.089  | 0.055 | 0.110 | 15815 |
|                                              |        | rs8013873   | T | C | 0.185 | -0.163 | 0.023 | 4.77E-13  | 173981 | 0.182 | -0.035 | 0.064 | 0.581 | 15815 |
|                                              |        | rs8062123   | T | G | 0.315 | 0.114  | 0.017 | 3.60E-11  | 173981 | 0.317 | 0.156  | 0.054 | 0.004 | 15815 |
|                                              |        | rs886997    | T | C | 0.093 | -0.346 | 0.029 | 2.98E-33  | 173981 | 0.093 | -0.009 | 0.084 | 0.916 | 15815 |
|                                              |        | rs9258506   | T | C | 0.040 | -0.374 | 0.039 | 7.90E-22  | 173981 | 0.037 | -0.194 | 0.129 | 0.132 | 15815 |
|                                              |        | rs9261659   | G | A | 0.109 | -0.161 | 0.027 | 4.74E-09  | 173981 | 0.111 | -0.042 | 0.079 | 0.596 | 15815 |
|                                              |        | rs9263827   | T | C | 0.044 | 0.724  | 0.033 | 1.13E-104 | 173981 | 0.051 | -0.097 | 0.110 | 0.380 | 15815 |
|                                              |        | rs9267808   | A | G | 0.013 | 1.421  | 0.042 | 1.00E-200 | 173981 | 0.016 | -0.170 | 0.183 | 0.353 | 15815 |
|                                              |        | rs9277195   | C | T | 0.492 | -0.326 | 0.015 | 2.29E-101 | 173981 | 0.506 | 0.070  | 0.050 | 0.160 | 15815 |
|                                              |        | rs9277990   | G | A | 0.190 | 0.180  | 0.023 | 7.88E-15  | 173981 | 0.188 | 0.054  | 0.063 | 0.395 | 15815 |
|                                              |        | rs9295661   | C | A | 0.087 | 0.282  | 0.030 | 7.52E-21  | 173981 | 0.087 | 0.162  | 0.086 | 0.058 | 15815 |
|                                              |        | rs9366637   | T | C | 0.052 | -0.182 | 0.027 | 1.06E-11  | 173981 | 0.054 | 0.004  | 0.112 | 0.972 | 15815 |
|                                              |        | rs9380293   | T | C | 0.016 | -0.774 | 0.057 | 1.94E-41  | 173981 | 0.017 | -0.056 | 0.193 | 0.771 | 15815 |
|                                              |        | rs9405008   | G | A | 0.038 | -0.238 | 0.041 | 5.31E-09  | 173981 | 0.034 | -0.028 | 0.137 | 0.841 | 15815 |
|                                              |        | rs9461389   | A | G | 0.108 | -0.161 | 0.022 | 1.68E-13  | 173981 | 0.107 | 0.069  | 0.080 | 0.387 | 15815 |
|                                              |        | rs9517712   | T | C | 0.246 | 0.096  | 0.016 | 4.26E-09  | 173981 | 0.251 | -0.015 | 0.056 | 0.790 | 15815 |
|                                              |        | rs9911533   | C | T | 0.371 | -0.087 | 0.015 | 5.14E-09  | 173981 | 0.365 | 0.025  | 0.051 | 0.619 | 15815 |
|                                              |        | rs9976073   | C | T | 0.262 | -0.094 | 0.017 | 1.13E-08  | 173981 | 0.261 | -0.007 | 0.056 | 0.898 | 15815 |
|                                              |        | rs10134419  | T | C | 0.276 | 0.090  | 0.015 | 6.25E-09  | 173981 | 0.760 | -0.041 | 0.067 | 0.530 | 872   |
|                                              |        | rs10214273  | G | T | 0.274 | -0.107 | 0.016 | 2.72E-11  | 173981 | 0.230 | -0.091 | 0.070 | 0.190 | 872   |
|                                              |        | rs1022674   | C | A | 0.226 | 0.107  | 0.017 | 4.61E-10  | 173981 | 0.280 | -0.006 | 0.063 | 0.920 | 872   |
|                                              |        | rs10484404  | T | C | 0.096 | -0.201 | 0.028 | 1.57E-12  | 173981 | 0.110 | 0.120  | 0.092 | 0.190 | 872   |
|                                              |        | rs11065979  | T | C | 0.441 | 0.203  | 0.015 | 2.47E-42  | 173981 | 0.450 | -0.097 | 0.057 | 0.090 | 872   |
|                                              |        | rs11203203  | A | G | 0.365 | 0.129  | 0.015 | 3.25E-17  | 173981 | 0.360 | 0.011  | 0.060 | 0.860 | 872   |
|                                              |        | rs115530337 | T | G | 0.039 | 0.300  | 0.030 | 3.15E-23  | 173981 | 0.050 | 0.110  | 0.130 | 0.400 | 872   |
|                                              |        | rs11878908  | C | T | 0.468 | -0.094 | 0.015 | 2.37E-10  | 173981 | 0.540 | -0.021 | 0.058 | 0.710 | 872   |
|                                              |        | rs12148472  | C | T | 0.126 | -0.153 | 0.024 | 1.91E-10  | 173981 | 0.120 | 0.075  | 0.090 | 0.400 | 872   |
|                                              |        | rs12204338  | G | A | 0.117 | -0.168 | 0.022 | 4.00E-14  | 173981 | 0.150 | 0.100  | 0.079 | 0.190 | 872   |
|                                              |        | rs1264691   | T | C | 0.063 | -0.312 | 0.039 | 1.88E-15  | 173981 | 0.086 | 0.082  | 0.110 | 0.460 | 872   |
|                                              |        | rs12828640  | A | G | 0.416 | 0.104  | 0.015 | 2.80E-12  | 173981 | 0.540 | -0.026 | 0.059 | 0.660 | 872   |
|                                              |        | rs12928537  | A | G | 0.323 | -0.154 | 0.016 | 1.10E-22  | 173981 | 0.360 | -0.023 | 0.059 | 0.700 | 872   |
|                                              |        | rs13215     | A | C | 0.052 | -0.298 | 0.035 | 1.32E-17  | 173981 | 0.060 | -0.110 | 0.130 | 0.380 | 872   |
|                                              |        | rs13216195  | T | C | 0.077 | -0.195 | 0.027 | 4.32E-13  | 173981 | 0.089 | 0.260  | 0.099 | 0.009 | 872   |
|                                              |        | rs138925279 | A | C | 0.039 | 0.207  | 0.031 | 5.45E-11  | 173981 | 0.051 | 0.021  | 0.130 | 0.870 | 872   |
|                                              |        | rs141615002 | C | T | 0.053 | -0.331 | 0.041 | 5.65E-16  | 173981 | 0.056 | 0.110  | 0.120 | 0.350 | 872   |
|                                              |        | rs151233    | T | C | 0.131 | 0.164  | 0.024 | 7.46E-12  | 173981 | 0.130 | -0.082 | 0.091 | 0.370 | 872   |
|                                              |        | rs156743    | C | T | 0.147 | 0.413  | 0.022 | 2.48E-77  | 173981 | 0.099 | 0.069  | 0.094 | 0.460 | 872   |
|                                              |        | rs1592410   | T | C | 0.455 | 0.269  | 0.015 | 4.58E-76  | 173981 | 0.390 | -0.010 | 0.059 | 0.870 | 872   |
|                                              |        | rs1702877   | T | C | 0.339 | 0.196  | 0.015 | 2.46E-37  | 173981 | 0.340 | 0.025  | 0.061 | 0.680 | 872   |
|                                              |        | rs17600959  | G | A | 0.437 | -0.115 | 0.015 | 3.83E-15  | 173981 | 0.440 | 0.036  | 0.058 | 0.530 | 872   |
|                                              |        | rs17652674  | A | C | 0.194 | 0.100  | 0.018 | 2.20E-08  | 173981 | 0.180 | -0.089 | 0.078 | 0.250 | 872   |
|                                              |        | rs1790946   | C | T | 0.473 | 0.103  | 0.015 | 1.51E-12  | 173981 | 0.530 | -0.041 | 0.059 | 0.500 | 872   |
|                                              |        | rs210215    | A | C | 0.446 | 0.194  | 0.015 | 4.30E-39  | 173981 | 0.500 | -0.009 | 0.058 | 0.880 | 872   |
|                                              |        | rs2111485   | A | G | 0.396 | -0.118 | 0.015 | 4.12E-15  | 173981 | 0.580 | -0.064 | 0.059 | 0.280 | 872   |
|                                              |        | rs2174281   | C | T | 0.460 | 0.105  | 0.015 | 1.51E-12  | 173981 | 0.480 | -0.013 | 0.057 | 0.820 | 872   |
|                                              |        | rs2243471   | G | A | 0.214 | 0.257  | 0.017 | 2.78E-54  | 173981 | 0.790 | 0.045  | 0.069 | 0.510 | 872   |
|                                              |        | rs2393664   | T | C | 0.179 | -0.105 | 0.018 | 1.44E-08  | 173981 | 0.790 | 0.032  | 0.069 | 0.640 | 872   |
|                                              |        | rs2542151   | G | T | 0.167 | 0.173  | 0.020 | 1.92E-18  | 173981 | 0.840 | 0.000  | 0.076 | 1.000 | 872   |
|                                              |        | rs2859059   | A | G | 0.170 | -0.570 | 0.024 | 9.88E-129 | 173981 | 0.280 | -0.022 | 0.065 | 0.730 | 872   |
|                                              |        | rs28743267  | G | T | 0.110 | -0.158 | 0.027 | 8.78E-09  | 173981 | 0.084 | 0.110  | 0.100 | 0.270 | 872   |
|                                              |        | rs2952140   | T | C | 0.482 | -0.084 | 0.015 | 7.63E-09  | 173981 | 0.490 | 0.015  | 0.058 | 0.790 | 872   |
|                                              |        | rs3024493   | A | C | 0.159 | -0.123 | 0.021 | 2.52E-09  | 173981 | 0.140 | -0.009 | 0.087 | 0.920 | 872   |
|                                              |        | rs3093971   | A | G | 0.103 | 0.765  | 0.026 | 6.25E-188 | 173981 | 0.110 | 0.001  | 0.089 | 1.000 | 872   |
|                                              |        | rs3094035   | T | G | 0.141 | 0.555  | 0.022 | 7.40E-145 | 173981 | 0.082 | 0.000  | 0.110 | 1.000 | 872   |
|                                              |        | rs3094090   | C | T | 0.053 | 0.499  | 0.031 | 5.56E-60  | 173981 | 0.068 | 0.110  | 0.110 | 0.320 | 872   |
|                                              |        | rs3128932   | T | C | 0.201 | 0.161  | 0.018 | 1.96E-19  | 173981 | 0.220 | 0.003  | 0.071 | 0.960 | 872   |
|                                              |        | rs3131854   | T | C | 0.215 | 0.231  | 0.019 | 3.94E-35  | 173981 | 0.800 | 0.000  | 0.076 | 1.000 | 872   |
|                                              |        | rs3135352   | C | A | 0.143 | -1.368 | 0.042 | 1.00E-200 | 173981 | 0.890 | 0.074  | 0.096 | 0.440 | 872   |
|                                              |        | rs35251378  | A | G | 0.294 | -0.124 | 0.017 | 1.25E-13  | 173981 | 0.290 | 0.068  | 0.063 | 0.280 | 872   |
|                                              |        | rs3749946   | A | C | 0.060 | -0.221 | 0.030 | 3.60E-13  | 173981 | 0.097 | -0.004 | 0.099 | 0.970 | 872   |
|                                              |        | rs3788992   | G | A | 0.188 | -0.136 | 0.019 | 9.42E-13  | 173981 | 0.200 | -0.100 | 0.075 | 0.170 | 872   |
|                                              |        | rs3842753   | T | G | 0.299 | -0.565 | 0.023 | 1.72E-135 | 173981 | 0.710 | -0.001 | 0.065 | 0.980 | 872   |
|                                              |        | rs3957111   | A | G | 0.100 | 0.384  | 0.026 | 3.02E-48  | 173981 | 0.140 | -0.013 | 0.088 | 0.880 | 872   |
|                                              |        | rs41266860  | T | C | 0.076 | 0.329  | 0.025 | 2.24E-38  | 173981 | 0.065 | -0.150 | 0.120 | 0.230 | 872   |
|                                              |        | rs4766998   | A | G | 0.310 | 0.111  | 0.016 | 3.05E-12  | 173981 | 0.670 | -0.056 | 0.065 | 0.380 | 872   |
|                                              |        | rs496160    | T | C | 0.436 | -0.438 | 0.015 | 2.23E-180 | 173981 | 0.570 | -0.009 | 0.057 | 0.880 | 872   |
|                                              |        | rs542907    | A | G | 0.439 | -0.081 | 0.015 | 3.96E-08  | 173981 | 0.450 | -0.120 | 0.059 | 0.043 | 872   |
|                                              |        | rs5756552   | T | C | 0.237 | 0.101  | 0.018 | 7.66E-09  | 173981 | 0.210 | 0.028  | 0.071 | 0.690 | 872   |
|                                              |        | rs58825580  | G | T | 0.139 | 0.301  | 0.022 | 7.50E-44  | 173981 | 0.093 | 0.120  | 0.098 | 0.220 | 872   |
|                                              |        | rs59867199  | T | C | 0.275 | 0.105  | 0.016 | 1.29E-11  | 173981 | 0.290 | -0.036 | 0.065 | 0.580 | 872   |
|                                              |        | rs6043409   | A | G | 0.355 | -0.104 | 0.016 | 4.35E-11  | 173981 | 0.650 | 0.053  | 0.062 | 0.390 | 872   |
|                                              |        | rs60652743  | G | A | 0.162 | -0.133 | 0.020 | 1.80E-11  | 173981 | 0.140 | -0.120 | 0.085 | 0.170 | 872   |
|                                              |        | rs6448432   | A | G | 0.303 | 0.100  | 0.01  |           |        |       |        |       |       |       |

|                 |                            |        |             |        |       |           |        |       |           |        |       |        |       |       |     |
|-----------------|----------------------------|--------|-------------|--------|-------|-----------|--------|-------|-----------|--------|-------|--------|-------|-------|-----|
| type 1 diabetes | recovery time with placebo | 159.78 | rs6925683   | G      | T     | 0.236     | 0.098  | 0.017 | 1.37E-08  | 173981 | 0.230 | 0.044  | 0.068 | 0.520 | 872 |
|                 |                            |        | rs6930138   | G      | A     | 0.426     | 0.196  | 0.015 | 1.27E-40  | 173981 | 0.560 | 0.130  | 0.061 | 0.033 | 872 |
|                 |                            |        | rs7226035   | C      | T     | 0.358     | -0.087 | 0.015 | 6.81E-09  | 173981 | 0.600 | 0.130  | 0.058 | 0.023 | 872 |
|                 |                            |        | rs7383258   | T      | C     | 0.052     | -0.889 | 0.062 | 1.27E-46  | 173981 | 0.060 | 0.068  | 0.120 | 0.570 | 872 |
|                 |                            |        | rs773554    | T      | C     | 0.270     | 0.147  | 0.016 | 3.15E-19  | 173981 | 0.260 | 0.045  | 0.063 | 0.470 | 872 |
|                 |                            |        | rs7922058   | G      | A     | 0.216     | -0.133 | 0.018 | 9.81E-14  | 173981 | 0.200 | 0.025  | 0.074 | 0.730 | 872 |
|                 |                            |        | rs7931848   | A      | C     | 0.119     | -0.141 | 0.025 | 2.07E-08  | 173981 | 0.120 | 0.048  | 0.087 | 0.580 | 872 |
|                 |                            |        | rs7956202   | G      | T     | 0.171     | -0.111 | 0.020 | 1.44E-08  | 173981 | 0.170 | 0.027  | 0.075 | 0.720 | 872 |
|                 |                            |        | rs9258550   | G      | A     | 0.100     | -0.448 | 0.027 | 1.52E-61  | 173981 | 0.091 | 0.053  | 0.097 | 0.590 | 872 |
|                 |                            |        | rs9260233   | C      | T     | 0.078     | -0.321 | 0.029 | 4.08E-28  | 173981 | 0.110 | -0.240 | 0.099 | 0.016 | 872 |
|                 |                            |        | rs9262155   | G      | A     | 0.080     | -0.227 | 0.032 | 8.41E-13  | 173981 | 0.099 | 0.110  | 0.098 | 0.280 | 872 |
|                 |                            |        | rs9378182   | G      | A     | 0.208     | -0.486 | 0.020 | 5.48E-133 | 173981 | 0.250 | 0.094  | 0.068 | 0.170 | 872 |
|                 |                            |        | rs9393826   | C      | A     | 0.110     | -0.157 | 0.022 | 3.92E-13  | 173981 | 0.880 | -0.007 | 0.088 | 0.940 | 872 |
|                 |                            |        | rs9501234   | G      | A     | 0.069     | 0.181  | 0.024 | 9.55E-14  | 173981 | 0.062 | -0.061 | 0.120 | 0.620 | 872 |
|                 |                            |        | rs9585056   | C      | T     | 0.244     | 0.095  | 0.017 | 1.06E-08  | 173981 | 0.770 | 0.097  | 0.066 | 0.140 | 872 |
|                 |                            |        | rs9976073   | C      | T     | 0.262     | -0.094 | 0.017 | 1.13E-08  | 173981 | 0.260 | 0.086  | 0.063 | 0.180 | 872 |
|                 |                            |        | rs10134419  | T      | C     | 0.276     | 0.090  | 0.015 | 6.25E-09  | 173981 | 0.730 | -0.052 | 0.066 | 0.430 | 851 |
|                 |                            |        | rs10214273  | G      | T     | 0.274     | -0.107 | 0.016 | 2.72E-11  | 173981 | 0.230 | 0.011  | 0.068 | 0.870 | 851 |
|                 |                            |        | rs1022674   | C      | A     | 0.226     | 0.107  | 0.017 | 4.61E-10  | 173981 | 0.280 | -0.034 | 0.066 | 0.600 | 851 |
|                 |                            |        | rs10484404  | T      | C     | 0.096     | -0.201 | 0.028 | 1.57E-12  | 173981 | 0.100 | 0.009  | 0.100 | 0.930 | 851 |
|                 |                            |        | rs11065979  | T      | C     | 0.441     | 0.203  | 0.015 | 2.47E-42  | 173981 | 0.440 | 0.040  | 0.059 | 0.500 | 851 |
|                 |                            |        | rs11203203  | A      | G     | 0.365     | 0.129  | 0.015 | 3.25E-17  | 173981 | 0.370 | 0.032  | 0.059 | 0.590 | 851 |
|                 |                            |        | rs11878908  | C      | T     | 0.468     | -0.094 | 0.015 | 2.37E-10  | 173981 | 0.530 | -0.018 | 0.057 | 0.750 | 851 |
|                 |                            |        | rs12148472  | C      | T     | 0.126     | -0.153 | 0.024 | 1.91E-10  | 173981 | 0.130 | -0.011 | 0.088 | 0.900 | 851 |
|                 |                            |        | rs12204338  | G      | A     | 0.117     | -0.168 | 0.022 | 4.00E-14  | 173981 | 0.160 | 0.046  | 0.078 | 0.560 | 851 |
|                 |                            |        | rs1264691   | T      | C     | 0.063     | -0.312 | 0.039 | 1.88E-15  | 173981 | 0.080 | -0.160 | 0.110 | 0.160 | 851 |
|                 |                            |        | rs12828640  | A      | G     | 0.416     | 0.104  | 0.015 | 2.80E-12  | 173981 | 0.560 | -0.052 | 0.059 | 0.380 | 851 |
|                 |                            |        | rs12928537  | A      | G     | 0.323     | -0.154 | 0.016 | 1.10E-22  | 173981 | 0.340 | -0.110 | 0.061 | 0.067 | 851 |
|                 |                            |        | rs13215     | A      | C     | 0.052     | -0.298 | 0.035 | 1.32E-17  | 173981 | 0.066 | -0.100 | 0.120 | 0.390 | 851 |
|                 |                            |        | rs13216195  | T      | C     | 0.077     | -0.195 | 0.027 | 4.32E-13  | 173981 | 0.088 | -0.083 | 0.110 | 0.430 | 851 |
|                 |                            |        | rs138925279 | A      | C     | 0.039     | 0.207  | 0.031 | 5.45E-11  | 173981 | 0.051 | 0.003  | 0.130 | 0.980 | 851 |
|                 |                            |        | rs141615002 | C      | T     | 0.053     | -0.331 | 0.041 | 5.65E-16  | 173981 | 0.050 | 0.028  | 0.130 | 0.830 | 851 |
|                 |                            |        | rs151233    | T      | C     | 0.131     | 0.164  | 0.024 | 7.46E-12  | 173981 | 0.150 | -0.180 | 0.089 | 0.039 | 851 |
|                 |                            |        | rs156743    | C      | T     | 0.147     | 0.413  | 0.022 | 2.48E-77  | 173981 | 0.110 | -0.033 | 0.099 | 0.740 | 851 |
|                 |                            |        | rs1592410   | T      | C     | 0.455     | 0.269  | 0.015 | 4.58E-76  | 173981 | 0.410 | -0.007 | 0.059 | 0.900 | 851 |
|                 |                            |        | rs1702877   | T      | C     | 0.339     | 0.196  | 0.015 | 2.46E-37  | 173981 | 0.330 | -0.030 | 0.062 | 0.630 | 851 |
|                 |                            |        | rs17600959  | G      | A     | 0.437     | -0.115 | 0.015 | 3.83E-15  | 173981 | 0.430 | -0.004 | 0.057 | 0.940 | 851 |
|                 |                            |        | rs17652674  | A      | C     | 0.194     | 0.100  | 0.018 | 2.20E-08  | 173981 | 0.200 | -0.039 | 0.074 | 0.600 | 851 |
|                 |                            |        | rs1790946   | C      | T     | 0.473     | 0.103  | 0.015 | 1.51E-12  | 173981 | 0.510 | -0.083 | 0.059 | 0.150 | 851 |
|                 |                            |        | rs210215    | A      | C     | 0.446     | 0.194  | 0.015 | 4.30E-39  | 173981 | 0.490 | -0.065 | 0.058 | 0.260 | 851 |
|                 |                            |        | rs2111485   | A      | G     | 0.396     | -0.118 | 0.015 | 4.12E-15  | 173981 | 0.580 | 0.089  | 0.060 | 0.140 | 851 |
|                 |                            |        | rs2174281   | C      | T     | 0.460     | 0.105  | 0.015 | 1.51E-12  | 173981 | 0.500 | -0.036 | 0.058 | 0.540 | 851 |
|                 |                            |        | rs2243471   | G      | A     | 0.214     | 0.257  | 0.017 | 2.78E-54  | 173981 | 0.770 | 0.048  | 0.069 | 0.490 | 851 |
|                 |                            |        | rs2267644   | A      | G     | 0.039     | 0.296  | 0.030 | 8.06E-23  | 173981 | 0.052 | -0.190 | 0.130 | 0.160 | 851 |
|                 |                            |        | rs2393664   | T      | C     | 0.179     | -0.105 | 0.018 | 1.44E-08  | 173981 | 0.770 | -0.140 | 0.068 | 0.046 | 851 |
|                 |                            |        | rs2542151   | G      | T     | 0.167     | 0.173  | 0.020 | 1.92E-18  | 173981 | 0.860 | -0.140 | 0.082 | 0.078 | 851 |
|                 |                            |        | rs2859059   | A      | G     | 0.170     | -0.570 | 0.024 | 9.88E-129 | 173981 | 0.280 | -0.072 | 0.065 | 0.270 | 851 |
|                 |                            |        | rs28743267  | G      | T     | 0.110     | -0.158 | 0.027 | 8.78E-09  | 173981 | 0.082 | -0.180 | 0.110 | 0.100 | 851 |
|                 |                            |        | rs2952140   | T      | C     | 0.482     | -0.084 | 0.015 | 7.63E-09  | 173981 | 0.480 | -0.039 | 0.056 | 0.490 | 851 |
|                 |                            |        | rs3024493   | A      | C     | 0.159     | -0.123 | 0.021 | 2.52E-09  | 173981 | 0.120 | 0.086  | 0.081 | 0.290 | 851 |
|                 |                            |        | rs3093971   | A      | G     | 0.103     | 0.765  | 0.026 | 6.25E-188 | 173981 | 0.110 | 0.180  | 0.094 | 0.062 | 851 |
|                 |                            |        | rs3094035   | T      | G     | 0.141     | 0.555  | 0.022 | 7.40E-145 | 173981 | 0.093 | -0.027 | 0.110 | 0.810 | 851 |
|                 |                            |        | rs3094090   | C      | T     | 0.053     | 0.499  | 0.031 | 5.56E-60  | 173981 | 0.071 | -0.017 | 0.110 | 0.880 | 851 |
|                 |                            |        | rs3128932   | T      | C     | 0.201     | 0.161  | 0.018 | 1.96E-19  | 173981 | 0.220 | -0.053 | 0.070 | 0.450 | 851 |
|                 |                            |        | rs3131854   | T      | C     | 0.215     | 0.231  | 0.019 | 3.94E-35  | 173981 | 0.770 | -0.010 | 0.070 | 0.890 | 851 |
|                 |                            |        | rs3135352   | C      | A     | 0.143     | -1.368 | 0.042 | 1.00E-200 | 173981 | 0.904 | -0.055 | 0.100 | 0.600 | 851 |
|                 |                            |        | rs35251378  | A      | G     | 0.294     | -0.124 | 0.017 | 1.25E-13  | 173981 | 0.270 | 0.011  | 0.065 | 0.870 | 851 |
|                 |                            |        | rs3749946   | A      | C     | 0.060     | -0.221 | 0.030 | 3.60E-13  | 173981 | 0.090 | -0.059 | 0.100 | 0.570 | 851 |
|                 |                            |        | rs3788892   | G      | A     | 0.188     | -0.136 | 0.019 | 9.42E-13  | 173981 | 0.170 | 0.011  | 0.075 | 0.880 | 851 |
|                 |                            |        | rs3842753   | T      | G     | 0.299     | -0.565 | 0.023 | 1.72E-135 | 173981 | 0.710 | -0.017 | 0.064 | 0.790 | 851 |
|                 |                            |        | rs3957111   | A      | G     | 0.100     | 0.384  | 0.026 | 3.02E-48  | 173981 | 0.140 | 0.033  | 0.085 | 0.700 | 851 |
|                 |                            |        | rs41266860  | T      | C     | 0.076     | 0.329  | 0.025 | 2.24E-38  | 173981 | 0.059 | -0.039 | 0.120 | 0.750 | 851 |
|                 |                            |        | rs4766998   | A      | G     | 0.310     | 0.111  | 0.016 | 3.05E-12  | 173981 | 0.680 | 0.007  | 0.063 | 0.910 | 851 |
|                 |                            |        | rs496160    | T      | C     | 0.436     | -0.438 | 0.015 | 2.23E-180 | 173981 | 0.560 | 0.051  | 0.056 | 0.360 | 851 |
|                 |                            |        | rs542907    | A      | G     | 0.439     | -0.081 | 0.015 | 3.96E-08  | 173981 | 0.450 | -0.130 | 0.059 | 0.027 | 851 |
|                 |                            |        | rs5756552   | T      | C     | 0.237     | 0.101  | 0.018 | 7.66E-09  | 173981 | 0.210 | 0.057  | 0.071 | 0.420 | 851 |
|                 |                            |        | rs58825580  | G      | T     | 0.139     | 0.301  | 0.022 | 7.50E-44  | 173981 | 0.110 | 0.054  | 0.095 | 0.570 | 851 |
|                 |                            |        | rs59867199  | T      | C     | 0.275     | 0.105  | 0.016 | 1.29E-11  | 173981 | 0.270 | -0.056 | 0.067 | 0.400 | 851 |
|                 |                            |        | rs6043409   | A      | G     | 0.355     | -0.104 | 0.016 | 4.35E-11  | 173981 | 0.650 | 0.110  | 0.058 | 0.065 | 851 |
|                 |                            |        | rs60652743  | G      | A     | 0.162     | -0.133 | 0.020 | 1.80E-11  | 173981 | 0.130 | 0.120  | 0.085 | 0.160 | 851 |
|                 |                            |        | rs6448432   | A      | G     | 0.303     | 0.100  | 0.016 | 1.91E-10  | 173981 | 0.340 | 0.034  | 0.062 | 0.590 | 851 |
|                 |                            |        | rs6456701   | C      | T     | 0.113     | 0.263  | 0.027 | 2.75E-23  | 173981 | 0.926 | -0.098 | 0.120 | 0.410 | 851 |
|                 |                            |        | rs6925683   | G      | T     | 0.236     | 0.098  | 0.017 | 1.37E-08  | 173981 | 0.230 | 0.044  | 0.068 | 0.520 | 872 |
|                 |                            |        | rs6930138   | G      | A     | 0.426     | 0.196  | 0.015 | 1.27E-40  | 173981 | 0.580 | -0.011 | 0.058 | 0.850 | 851 |
|                 |                            |        | rs7226035   | C      | T     | 0.358     | -0.087 | 0.015 | 6.81E-09  | 173981 | 0.610 | -0.140 | 0.061 | 0.025 | 851 |
|                 |                            |        | rs7383258   | T      | C     | 0.052     | -0.889 | 0.062 | 1.27E-46  | 173981 | 0.064 | -0.023 | 0.120 | 0.850 | 851 |
|                 |                            |        | rs773554    | T      | C     | 0.270     | 0.147  | 0.016 | 3.15E-19  | 173981 | 0.280 | -0.052 | 0.062 | 0.400 | 851 |
|                 |                            |        | rs7922058   | G      | A     | 0.216     | -0.133 | 0.018 | 9.81E-14  | 173981 | 0.210 | 0.063  | 0.074 | 0.390 | 851 |
|                 |                            |        | rs7931848   | A      | C     | 0.119     | -0.141 | 0.025 | 2.07E-08  | 173981 | 0.110 | -0.019 | 0.096 | 0.840 | 851 |
|                 |                            |        | rs7956202   | G      | T     | 0.171     | -0.111 | 0.020 | 1.44E-08  | 173981 | 0.170 | -0.062 | 0.077 | 0.420 | 851 |
| rs9258550       | G                          | A      | 0.100       | -0.448 | 0.027 | 1.52E-61  | 173981 | 0.110 | -0.089    | 0.095  | 0.350 | 851    |       |       |     |
| rs9260233       | C                          | T      | 0.078       | -0.321 | 0.029 | 4.08E-28  | 173981 | 0.100 | 0.053     | 0.094  | 0.570 | 851    |       |       |     |
| rs9262155       | G                          | A      | 0.080       | -0.227 | 0.032 | 8.41E-13  | 173981 | 0.097 | 0.120     | 0.100  | 0.220 | 851    |       |       |     |
| rs9348795       | C                          | T      | 0.048       | 0.335  | 0.028 | 1.39E-32  | 173981 | 0.051 | -0.160    | 0.130  | 0.230 | 851    |       |       |     |
| rs9378182       | G                          | A      | 0.208       | -0.486 | 0.020 | 5.48E-133 | 173981 | 0.230 | -0.071    | 0.069  | 0.310 | 851    |       |       |     |
| rs9393826       | C                          | A      | 0.110       | -0.157 | 0.022 | 3.92E-13  | 173981 | 0.880 | -0.046    | 0.091  | 0.610 | 851    |       |       |     |
| rs9501234       | A                          | G      | 0.069       | 0.181  | 0.024 | 9.55E-14  | 173981 | 0.056 | 0.180     | 0.120  | 0.130 | 851    |       |       |     |
| rs9585056       | C                          | T      | 0.244       | 0.095  | 0.017 | 1.06E-08  | 173981 | 0.780 | -0.180    | 0.072  | 0.013 | 851    |       |       |     |
| rs9976073       | C                          | T      | 0.262       | -0.094 | 0.017 | 1.13E-08  | 173981 | 0.250 | -0.001    | 0.066  | 0.990 | 851    |       |       |     |

Supplementary Table 2. Sensitivity analysis results between type 1 diabetes and COVID-19 infection and prognosis

| Exposure        | Outcome                                 | nSNP | Cochran's Q |         | MR Egger  |                   | MRPRESSO Global Test |         |
|-----------------|-----------------------------------------|------|-------------|---------|-----------|-------------------|----------------------|---------|
|                 |                                         |      | value       | P value | intercept | intercept P value | value                | P value |
| Type 1 diabetes | COVID-19 positive                       | 124  | 129.100     | 0.340   | -0.003    | 0.241             | 130.910              | 0.340   |
|                 | Hospitalized COVID-19                   | 123  | 108.220     | 0.810   | 0.006     | 0.335             | 110.220              | 0.810   |
|                 | Severe COVID-19                         | 123  | 121.370     | 0.500   | 0.000     | 0.999             | 123.710              | 0.500   |
|                 | COVID-19 death                          | 123  | 125.770     | 0.390   | 0.004     | 0.660             | 128.080              | 0.390   |
|                 | Recovery time with colchicine treatment | 72   | 68.020      | 0.580   | -0.005    | 0.691             | 69.170               | 0.600   |
|                 | Recovery time with placebo treatment    | 73   | 77.680      | 0.300   | -0.016    | 0.254             | 79.120               | 0.330   |

Notes: nSNP is the number of SNPs used as instrumental variables (IVs).

Supplementary Table 3. SNP exclusion information after PhenoScanner V2

| exposure                        | Number of removed SNPs | SNP         | Trait                                  | P         |
|---------------------------------|------------------------|-------------|----------------------------------------|-----------|
| Severe COVID-19, COVID-19 death | 61                     | rs1063478   | Self-reported psoriasis                | 3.74E-52  |
|                                 |                        | rs1063478   | Rheumatoid arthritis                   | 5.80E-13  |
|                                 |                        | rs11085725  | Self-reported psoriasis                | 3.01E-11  |
|                                 |                        | rs11085725  | Rheumatoid arthritis                   | 1.10E-10  |
|                                 |                        | rs11203203  | Rheumatoid arthritis                   | 8.70E-09  |
|                                 |                        | rs11203203  | Celiac disease or Rheumatoid arthritis | 1.00E-08  |
|                                 |                        | rs115018313 | Rheumatoid arthritis                   | 4.60E-162 |
|                                 |                        | rs115018313 | Rheumatoid arthritis                   | 7.10E-162 |
|                                 |                        | rs115892333 | Self-reported multiple sclerosis       | 9.64E-10  |
|                                 |                        | rs115892333 | Rheumatoid arthritis                   | 1.50E-08  |
|                                 |                        | rs115892333 | Rheumatoid arthritis                   | 3.80E-08  |
|                                 |                        | rs12192673  | Rheumatoid arthritis                   | 1.81E-09  |
|                                 |                        | rs12192673  | Rheumatoid arthritis                   | 1.81E-09  |
|                                 |                        | rs12207915  | Rheumatoid arthritis                   | 8.90E-38  |
|                                 |                        | rs12207915  | Rheumatoid arthritis                   | 4.10E-30  |
|                                 |                        | rs12207915  | Self-reported psoriasis                | 1.09E-13  |
|                                 |                        | rs12215593  | Rheumatoid arthritis                   | 6.00E-11  |
|                                 |                        | rs1233478   | Primary sclerosing cholangitis         | 6.28E-64  |
|                                 |                        | rs12506688  | Rheumatoid arthritis                   | 2.20E-16  |
|                                 |                        | rs12506688  | Rheumatoid arthritis                   | 2.20E-16  |
|                                 |                        | rs12927355  | Primary biliary cirrhosis              | 5.33E-13  |
|                                 |                        | rs13212534  | Primary sclerosing cholangitis         | 1.12E-63  |
|                                 |                        | rs156743    | Primary sclerosing cholangitis         | 6.04E-74  |
|                                 |                        | rs17179851  | Rheumatoid arthritis                   | 3.20E-21  |
|                                 |                        | rs17179851  | Rheumatoid arthritis                   | 1.20E-18  |
|                                 |                        | rs17207622  | Rheumatoid arthritis                   | 6.90E-12  |
|                                 |                        | rs17207622  | Rheumatoid arthritis                   | 3.40E-11  |
|                                 |                        | rs17652674  | Rheumatoid arthritis                   | 2.20E-09  |
|                                 |                        | rs17652674  | Rheumatoid arthritis                   | 9.00E-09  |
|                                 |                        | rs1990760   | Inflammatory bowel disease             | 4.00E-10  |
|                                 |                        | rs1994565   | Rheumatoid arthritis                   | 1.60E-06  |
|                                 |                        | rs204996    | Rheumatoid arthritis                   | 1.60E-34  |
|                                 |                        | rs204996    | Rheumatoid arthritis                   | 5.40E-33  |
|                                 |                        | rs2212434   | Inflammatory bowel disease             | 8.17E-20  |
|                                 |                        | rs2313430   | Primary biliary cirrhosis              | 1.36E-13  |
|                                 |                        | rs2313430   | Inflammatory bowel disease             | 1.71E-13  |
|                                 |                        | rs2395471   | Self-reported psoriasis                | 4.61E-137 |
|                                 |                        | rs241435    | Rheumatoid arthritis                   | 4.10E-30  |
|                                 |                        | rs241435    | Rheumatoid arthritis                   | 4.40E-30  |
|                                 |                        | rs2476601   | Rheumatoid arthritis                   | 1.00E-149 |
|                                 |                        | rs2476601   | Rheumatoid arthritis                   | 1.60E-149 |
|                                 |                        | rs2516698   | Rheumatoid arthritis                   | 3.21E-08  |
|                                 |                        | rs2516698   | Rheumatoid arthritis                   | 3.21E-08  |
|                                 |                        | rs2844466   | Primary sclerosing cholangitis         | 4.34E-48  |
|                                 |                        | rs28746904  | Self-reported psoriasis                | 1.66E-32  |
|                                 |                        | rs28746904  | Rheumatoid arthritis                   | 2.80E-30  |
|                                 |                        | rs28893513  | Self-reported psoriasis                | 7.40E-43  |
|                                 |                        | rs3024505   | Inflammatory bowel disease             | 6.66E-42  |
|                                 |                        | rs3024505   | Inflammatory bowel disease             | 7.00E-42  |
|                                 |                        | rs3024505   | Inflammatory bowel disease             | 6.00E-31  |
|                                 |                        | rs3087243   | Rheumatoid arthritis                   | 1.70E-22  |
|                                 |                        | rs3087243   | Rheumatoid arthritis                   | 4.00E-22  |
|                                 |                        | rs3093971   | Rheumatoid arthritis                   | 5.50E-19  |
|                                 |                        | rs3130363   | Primary sclerosing cholangitis         | 7.08E-138 |
|                                 |                        | rs3130666   | Rheumatoid arthritis                   | 2.80E-12  |
|                                 |                        | rs3130666   | Rheumatoid arthritis                   | 2.90E-12  |
|                                 |                        | rs3134962   | Primary sclerosing cholangitis         | 1.32E-138 |
|                                 |                        | rs3184504   | Celiac disease                         | 5.40E-21  |
|                                 |                        | rs34864796  | Primary sclerosing cholangitis         | 6.03E-69  |
|                                 |                        | rs3763355   | Primary biliary cholangitis            | 0.00E+00  |
|                                 |                        | rs3763355   | Rheumatoid arthritis                   | 2.30E-95  |
|                                 |                        | rs3763355   | Rheumatoid arthritis                   | 1.97E-50  |
|                                 |                        | rs3763355   | Rheumatoid arthritis                   | 1.97E-50  |
|                                 |                        | rs3763355   | Rheumatoid arthritis                   | 2.70E-34  |
|                                 |                        | rs41265836  | Rheumatoid arthritis                   | 1.40E-60  |
|                                 |                        | rs41265836  | Rheumatoid arthritis                   | 1.60E-60  |
|                                 |                        | rs41267086  | Rheumatoid arthritis                   | 7.20E-41  |
|                                 |                        | rs41267086  | Rheumatoid arthritis                   | 8.50E-40  |
|                                 |                        | rs41268924  | Rheumatoid arthritis                   | 1.40E-226 |
|                                 |                        | rs41268924  | Rheumatoid arthritis                   | 2.60E-226 |
|                                 |                        | rs4947258   | Primary sclerosing cholangitis         | 5.49E-149 |
|                                 |                        | rs537544    | Rheumatoid arthritis                   | 8.00E-11  |
|                                 |                        | rs55844831  | Rheumatoid arthritis                   | 7.60E-39  |
|                                 |                        | rs55844831  | Rheumatoid arthritis                   | 8.50E-39  |
|                                 |                        | rs56111713  | Self-reported psoriasis                | 5.40E-16  |
|                                 |                        | rs6912701   | Primary biliary cholangitis            | 0.00E+00  |
|                                 |                        | rs6912701   | Rheumatoid arthritis                   | 9.60E-27  |
|                                 |                        | rs6912701   | Rheumatoid arthritis                   | 1.20E-26  |
|                                 |                        | rs6913182   | Self-reported multiple sclerosis       | 1.00E-88  |
|                                 |                        | rs6913182   | Rheumatoid arthritis                   | 1.10E-66  |
|                                 |                        | rs6913182   | Rheumatoid arthritis                   | 4.60E-58  |
|                                 |                        | rs71565365  | Self-reported psoriasis                | 3.41E-18  |
|                                 |                        | rs71565365  | Rheumatoid arthritis                   | 1.00E-14  |
|                                 |                        | rs71565365  | Rheumatoid arthritis                   | 2.00E-13  |
|                                 |                        | rs7237497   | Inflammatory bowel disease             | 1.24E-10  |
|                                 |                        | rs7237497   | Rheumatoid arthritis                   | 1.30E-10  |
|                                 |                        | rs7237497   | Rheumatoid arthritis                   | 4.60E-08  |
|                                 |                        | rs73391152  | Rheumatoid arthritis                   | 6.90E-13  |
|                                 |                        | rs73391152  | Rheumatoid arthritis                   | 1.40E-11  |
|                                 |                        | rs73396583  | Self-reported psoriasis                | 1.33E-21  |
|                                 |                        | rs73396583  | Rheumatoid arthritis                   | 1.00E-19  |
|                                 |                        | rs73396583  | Rheumatoid arthritis                   | 3.80E-13  |
|                                 |                        | rs73396583  | Rheumatoid arthritis                   | 2.60E-08  |
|                                 |                        | rs73400833  | Rheumatoid arthritis                   | 3.40E-38  |
|                                 |                        | rs73400833  | Rheumatoid arthritis                   | 1.40E-33  |
|                                 |                        | rs73400833  | Primary sclerosing cholangitis         | 1.03E-16  |
|                                 |                        | rs773560    | Rheumatoid arthritis                   | 9.20E-16  |
|                                 |                        | rs773560    | Rheumatoid arthritis                   | 1.50E-11  |
|                                 |                        | rs7755997   | Primary sclerosing cholangitis         | 8.40E-16  |
|                                 |                        | rs7772373   | Self-reported psoriasis                | 6.00E-40  |
|                                 |                        | rs78354120  | Self-reported psoriasis                | 9.16E-37  |

|           |                                |          |
|-----------|--------------------------------|----------|
| rs9261659 | Rheumatoid arthritis           | 1.20E-19 |
| rs9261659 | Rheumatoid arthritis           | 1.20E-19 |
| rs9267808 | Rheumatoid arthritis           | 2.80E-15 |
| rs9267808 | Rheumatoid arthritis           | 3.00E-15 |
| rs9277195 | Rheumatoid arthritis           | 9.80E-25 |
| rs9277990 | Rheumatoid arthritis           | 1.00E-16 |
| rs9295661 | Primary sclerosing cholangitis | 1.65E-38 |
| rs9380293 | Rheumatoid arthritis           | 2.40E-89 |
| rs9380293 | Rheumatoid arthritis           | 8.20E-64 |
| rs9380293 | Rheumatoid arthritis           | 1.20E-29 |
| rs9380293 | Inflammatory bowel disease     | 5.08E-09 |

| Supplementary Table 4. Selected IVs in reverse MR analysis |                                         |           |    |          |        |        |          |            |         |        |       |       |            |
|------------------------------------------------------------|-----------------------------------------|-----------|----|----------|--------|--------|----------|------------|---------|--------|-------|-------|------------|
| exposure                                                   | SNP                                     | A1        | A2 | exposure |        |        |          |            | outcome |        |       |       |            |
|                                                            |                                         |           |    | eaf      | beta   | se     | pval     | samplesize | eaf     | beta   | se    | pval  | samplesize |
| COVID-19 positive                                          | rs1015135                               | G         | A  | 0.527    | 0.057  | 0.013  | 6.16E-06 | 98377      | 0.516   | 0.013  | 0.014 | 0.378 | 173981     |
|                                                            | rs116126009                             | A         | G  | 0.048    | -0.132 | 0.029  | 7.26E-06 | 98377      | 0.052   | -0.044 | 0.035 | 0.220 | 173981     |
|                                                            | rs117103304                             | A         | C  | 0.017    | -0.218 | 0.048  | 6.24E-06 | 98377      | 0.016   | -0.025 | 0.084 | 0.763 | 173981     |
|                                                            | rs11721544                              | C         | T  | 0.677    | 0.060  | 0.013  | 6.19E-06 | 98377      | 0.683   | 0.019  | 0.016 | 0.216 | 173981     |
|                                                            | rs13130146                              | A         | G  | 0.201    | 0.072  | 0.016  | 3.76E-06 | 98377      | 0.199   | 0.014  | 0.018 | 0.434 | 173981     |
|                                                            | rs1595608                               | G         | T  | 0.242    | 0.066  | 0.015  | 7.11E-06 | 98377      | 0.245   | 0.004  | 0.017 | 0.804 | 173981     |
|                                                            | rs16968480                              | A         | G  | 0.341    | 0.061  | 0.013  | 4.21E-06 | 98377      | 0.334   | -0.010 | 0.017 | 0.558 | 173981     |
|                                                            | rs55844269                              | A         | G  | 0.153    | -0.079 | 0.018  | 6.68E-06 | 98377      | 0.154   | 0.007  | 0.025 | 0.762 | 173981     |
|                                                            | rs7202189                               | C         | A  | 0.732    | 0.065  | 0.014  | 5.08E-06 | 98377      | 0.730   | -0.013 | 0.017 | 0.452 | 173981     |
|                                                            | rs73062389                              | A         | G  | 0.061    | 0.183  | 0.026  | 2.32E-12 | 98377      | 0.056   | 0.032  | 0.046 | 0.484 | 173981     |
|                                                            | rs7545756                               | C         | A  | 0.644    | -0.059 | 0.013  | 6.48E-06 | 98377      | 0.645   | 0.010  | 0.015 | 0.509 | 173981     |
|                                                            | rs76394096                              | A         | G  | 0.144    | -0.082 | 0.018  | 5.13E-06 | 98377      | 0.145   | 0.010  | 0.025 | 0.674 | 173981     |
|                                                            | rs80269587                              | C         | T  | 0.038    | 0.160  | 0.033  | 1.50E-06 | 98377      | 0.035   | 0.056  | 0.051 | 0.269 | 173981     |
|                                                            | rs842225                                | A         | G  | 0.463    | 0.059  | 0.013  | 3.56E-06 | 98377      | 0.464   | 0.005  | 0.016 | 0.776 | 173981     |
|                                                            | rs9411378                               | A         | C  | 0.224    | 0.104  | 0.016  | 2.44E-11 | 98377      | 0.230   | -0.063 | 0.030 | 0.034 | 173981     |
| Hospitalized COVID-19                                      | rs111805396                             | A         | C  | 0.021    | 0.482  | 0.108  | 8.43E-06 | 16551      | 0.021   | -0.027 | 0.063 | 0.664 | 173981     |
|                                                            | rs11660443                              | T         | C  | 0.185    | -0.176 | 0.040  | 9.56E-06 | 16551      | 0.174   | -0.009 | 0.021 | 0.678 | 173981     |
|                                                            | rs11689857                              | T         | C  | 0.482    | -0.146 | 0.031  | 1.89E-06 | 16551      | 0.495   | -0.024 | 0.014 | 0.099 | 173981     |
|                                                            | rs11783271                              | T         | G  | 0.065    | 0.288  | 0.064  | 7.82E-06 | 16551      | 0.065   | -0.112 | 0.053 | 0.034 | 173981     |
|                                                            | rs13078854                              | A         | G  | 0.073    | 0.430  | 0.060  | 8.76E-13 | 16551      | 0.066   | 0.030  | 0.030 | 0.313 | 173981     |
|                                                            | rs17100497                              | A         | G  | 0.140    | 0.209  | 0.045  | 3.12E-06 | 16551      | 0.140   | -0.040 | 0.022 | 0.065 | 173981     |
|                                                            | rs3737997                               | G         | A  | 0.056    | -0.326 | 0.071  | 4.05E-06 | 16551      | 0.054   | 0.072  | 0.041 | 0.079 | 173981     |
|                                                            | rs4233818                               | G         | A  | 0.297    | 0.171  | 0.035  | 8.51E-07 | 16551      | 0.289   | -0.003 | 0.019 | 0.883 | 173981     |
|                                                            | rs4435445                               | A         | G  | 0.190    | -0.181 | 0.040  | 4.70E-06 | 16551      | 0.185   | 0.007  | 0.022 | 0.729 | 173981     |
|                                                            | rs72841886                              | T         | C  | 0.060    | 0.311  | 0.068  | 5.11E-06 | 16551      | 0.066   | 0.020  | 0.034 | 0.547 | 173981     |
|                                                            | rs79405378                              | T         | G  | 0.057    | 0.302  | 0.068  | 8.69E-06 | 16551      | 0.052   | 0.048  | 0.039 | 0.219 | 173981     |
|                                                            | rs10891500                              | C         | T  | 0.017    | 0.854  | 0.193  | 9.52E-06 | 15815      | 0.016   | 0.019  | 0.028 | 0.495 | 173981     |
|                                                            | rs10906733                              | G         | A  | 0.609    | 0.227  | 0.051  | 7.68E-06 | 15815      | 0.612   | -0.004 | 0.017 | 0.815 | 173981     |
|                                                            | rs11576687                              | T         | C  | 0.143    | 0.294  | 0.066  | 9.32E-06 | 15815      | 0.143   | -0.023 | 0.024 | 0.334 | 173981     |
|                                                            | rs116862993                             | G         | A  | 0.019    | 0.788  | 0.174  | 6.37E-06 | 15815      | 0.019   | -0.052 | 0.055 | 0.350 | 173981     |
| Severe COVID-19                                            | rs146375688                             | T         | C  | 0.047    | 0.564  | 0.113  | 6.55E-07 | 15815      | 0.042   | 0.062  | 0.034 | 0.070 | 173981     |
|                                                            | rs17402887                              | C         | T  | 0.073    | 0.412  | 0.091  | 6.43E-06 | 15815      | 0.071   | -0.034 | 0.031 | 0.283 | 173981     |
|                                                            | rs71325088                              | C         | T  | 0.073    | 0.523  | 0.092  | 1.15E-08 | 15815      | 0.066   | 0.031  | 0.030 | 0.307 | 173981     |
|                                                            | rs822293                                | A         | G  | 0.057    | 0.476  | 0.104  | 4.27E-06 | 15815      | 0.051   | 0.017  | 0.031 | 0.595 | 173981     |
|                                                            | rs13141729                              | C         | T  | 0.096    | 0.379  | 0.083  | 5.47E-06 | 15815      | 0.097   | -0.039 | 0.022 | 0.084 | 173981     |
|                                                            | rs28701638                              | C         | T  | 0.162    | -0.292 | 0.066  | 9.29E-06 | 15815      | 0.169   | -0.013 | 0.019 | 0.494 | 173981     |
|                                                            | rs4987280                               | T         | C  | 0.276    | 0.249  | 0.055  | 6.70E-06 | 15815      | 0.273   | -0.037 | 0.017 | 0.026 | 173981     |
|                                                            | rs79143240                              | C         | T  | 0.011    | 1.107  | 0.250  | 9.52E-06 | 15815      | 0.011   | -0.009 | 0.066 | 0.891 | 173981     |
|                                                            | rs10487763                              | G         | T  | 0.085    | 0.450  | 0.099  | 5.30E-06 | 872        | 0.108   | 0.012  | 0.024 | 0.610 | 173981     |
|                                                            | rs11043079                              | G         | T  | 0.390    | 0.270  | 0.061  | 8.80E-06 | 872        | 0.411   | -0.014 | 0.017 | 0.404 | 173981     |
|                                                            | rs115506471                             | T         | C  | 0.053    | 0.570  | 0.130  | 4.90E-06 | 872        | 0.053   | 0.017  | 0.042 | 0.683 | 173981     |
|                                                            | rs117872821                             | T         | C  | 0.098    | 0.430  | 0.094  | 3.80E-06 | 872        | 0.122   | -0.019 | 0.028 | 0.493 | 173981     |
|                                                            | rs12616254                              | C         | T  | 0.110    | -0.440 | 0.086  | 2.60E-07 | 872        | 0.895   | 0.023  | 0.026 | 0.374 | 173981     |
|                                                            | rs1989457                               | A         | G  | 0.430    | -0.280 | 0.063  | 6.80E-06 | 872        | 0.406   | 0.002  | 0.015 | 0.869 | 173981     |
|                                                            | Recovery time with colchicine treatment | rs2969949 | T  | G        | 0.250  | -0.290 | 0.065    | 1.00E-05   | 872     | 0.724  | 0.032 | 0.019 | 0.085      |
| rs301958                                                   |                                         | C         | T  | 0.160    | -0.380 | 0.075  | 3.20E-07 | 872        | 0.853   | 0.027  | 0.023 | 0.244 | 173981     |
| rs35581380                                                 |                                         | A         | G  | 0.092    | 0.510  | 0.110  | 5.90E-06 | 872        | 0.918   | -0.015 | 0.035 | 0.671 | 173981     |
| rs7545951                                                  |                                         | C         | T  | 0.092    | -0.430 | 0.095  | 5.80E-06 | 872        | 0.882   | 0.001  | 0.022 | 0.970 | 173981     |
| rs77050502                                                 |                                         | T         | C  | 0.061    | -0.480 | 0.110  | 5.90E-06 | 872        | 0.921   | -0.012 | 0.029 | 0.672 | 173981     |
| rs7781650                                                  |                                         | T         | G  | 0.110    | 0.450  | 0.100  | 7.50E-06 | 872        | 0.898   | -0.049 | 0.022 | 0.030 | 173981     |
| rs8037453                                                  |                                         | C         | A  | 0.075    | 0.470  | 0.100  | 8.40E-06 | 872        | 0.057   | 0.031  | 0.033 | 0.342 | 173981     |
| rs10794057                                                 |                                         | G         | A  | 0.430    | 0.280  | 0.058  | 1.40E-06 | 851        | 0.572   | 0.003  | 0.016 | 0.861 | 173981     |
| rs10964597                                                 |                                         | C         | A  | 0.170    | 0.380  | 0.081  | 2.60E-06 | 851        | 0.804   | 0.004  | 0.023 | 0.849 | 173981     |
| rs11036883                                                 |                                         | G         | A  | 0.330    | -0.270 | 0.059  | 6.90E-06 | 851        | 0.622   | 0.001  | 0.015 | 0.945 | 173981     |
| rs11670095                                                 |                                         | T         | C  | 0.063    | 0.550  | 0.110  | 1.40E-06 | 851        | 0.066   | -0.009 | 0.035 | 0.803 | 173981     |
| rs12317844                                                 |                                         | T         | C  | 0.320    | 0.270  | 0.060  | 5.40E-06 | 851        | 0.306   | 0.005  | 0.016 | 0.735 | 173981     |
| rs145670222                                                |                                         | C         | T  | 0.120    | -0.440 | 0.100  | 9.70E-06 | 851        | 0.106   | -0.021 | 0.027 | 0.432 | 173981     |
| rs2180291                                                  |                                         | A         | C  | 0.190    | 0.380  | 0.083  | 6.30E-06 | 851        | 0.856   | 0.005  | 0.024 | 0.824 | 173981     |
| rs34651317                                                 |                                         | C         | T  | 0.280    | 0.280  | 0.064  | 8.50E-06 | 851        | 0.288   | 0.008  | 0.016 | 0.627 | 173981     |
| Recovery time with placebo treatment                       | rs4902234                               | C         | T  | 0.110    | 0.490  | 0.110  | 4.40E-06 | 851        | 0.910   | 0.006  | 0.037 | 0.861 | 173981     |
|                                                            | rs62036216                              | C         | T  | 0.075    | -0.520 | 0.110  | 1.60E-06 | 851        | 0.938   | -0.012 | 0.037 | 0.753 | 173981     |
|                                                            | rs76078535                              | G         | A  | 0.110    | -0.420 | 0.087  | 1.60E-06 | 851        | 0.882   | 0.013  | 0.030 | 0.655 | 173981     |
|                                                            | rs7705685                               | G         | A  | 0.100    | 0.440  | 0.096  | 4.80E-06 | 851        | 0.094   | 0.043  | 0.026 | 0.104 | 173981     |
|                                                            | rs77348070                              | T         | C  | 0.051    | -0.550 | 0.120  | 5.50E-06 | 851        | 0.969   | 0.108  | 0.048 | 0.025 | 173981     |
|                                                            | rs78488740                              | C         | T  | 0.058    | 0.570  | 0.120  | 2.20E-06 | 851        | 0.058   | 0.018  | 0.036 | 0.605 | 173981     |
|                                                            | rs7874333                               | G         | A  | 0.310    | -0.290 | 0.064  | 8.20E-06 | 851        | 0.300   | 0.004  | 0.015 | 0.802 | 173981     |

Notes: MR: mendelian randomization, A1: effect allele, A2: other allele, beta: estimate coefficient, se: standard error of coefficient estimate.

Supplementary Table 5. The results of pathway enrichment analysis

| term_name                                                                                                                 | term_id    | adjusted_p_value | intersections                                                                                             |
|---------------------------------------------------------------------------------------------------------------------------|------------|------------------|-----------------------------------------------------------------------------------------------------------|
| regulation of immune system process                                                                                       | GO:0002682 | 1.57504E-06      | SIRPG,TYK2,UBASH3A,HLA-DQA2,HLA-DMA,CD226,IFIH1,AGER,CTSH,IKZF3,GATA3,CCDC88B,IL2RA,HLA-E,HFE             |
| regulation of leukocyte activation                                                                                        | GO:0002694 | 1.77729E-06      | SIRPG,TYK2,HLA-DQA2,HLA-DMA,CD226,AGER,IKZF3,GATA3,CCDC88B,HLA-E,HFE                                      |
| regulation of T cell activation                                                                                           | GO:0050863 | 2.6689E-06       | SIRPG,TYK2,HLA-DQA2,HLA-DMA,AGER,GATA3,CCDC88B,HLA-E,HFE                                                  |
| regulation of leukocyte cell-cell adhesion                                                                                | GO:1903037 | 2.92777E-06      | SIRPG,TYK2,HLA-DQA2,HLA-DMA,AGER,GATA3,CCDC88B,HLA-E,HFE                                                  |
| positive regulation of T cell activation                                                                                  | GO:0050870 | 3.18715E-06      | SIRPG,TYK2,HLA-DQA2,HLA-DMA,AGER,GATA3,CCDC88B,HLA-E                                                      |
| regulation of cell activation                                                                                             | GO:0050865 | 4.23448E-06      | SIRPG,TYK2,HLA-DQA2,HLA-DMA,CD226,AGER,IKZF3,GATA3,CCDC88B,HLA-E,HFE                                      |
| positive regulation of leukocyte cell-cell adhesion                                                                       | GO:1903039 | 6.90747E-06      | SIRPG,TYK2,HLA-DQA2,HLA-DMA,AGER,GATA3,CCDC88B,HLA-E                                                      |
| regulation of lymphocyte activation                                                                                       | GO:0051249 | 7.57579E-06      | SIRPG,TYK2,HLA-DQA2,HLA-DMA,AGER,IKZF3,GATA3,CCDC88B,HLA-E,HFE                                            |
| leukocyte cell-cell adhesion                                                                                              | GO:0007159 | 8.48522E-06      | SIRPG,TYK2,HLA-DQA2,HLA-DMA,AGER,GATA3,CCDC88B,HLA-E,HFE                                                  |
| positive regulation of leukocyte activation                                                                               | GO:0002696 | 2.07423E-05      | SIRPG,TYK2,HLA-DQA2,HLA-DMA,CD226,AGER,GATA3,CCDC88B,HLA-E                                                |
| immune system process                                                                                                     | GO:0002376 | 2.38593E-05      | SIRPG,TYK2,UBASH3A,HLA-DQA2,HLA-DMA,GNL1,TRIM38,CD226,IFIH1,AGER,CTSH,IKZF3,GATA3,CCDC88B,IL2RA,HLA-E,HFE |
| positive regulation of cell-cell adhesion                                                                                 | GO:0022409 | 2.72346E-05      | SIRPG,TYK2,HLA-DQA2,HLA-DMA,AGER,GATA3,CCDC88B,HLA-E                                                      |
| positive regulation of cell adhesion                                                                                      | GO:0045785 | 2.75887E-05      | SIRPG,TYK2,HLA-DQA2,HLA-DMA,AGER,CARMIL1,GATA3,CCDC88B,HLA-E                                              |
| positive regulation of cell activation                                                                                    | GO:0050867 | 2.82397E-05      | SIRPG,TYK2,HLA-DQA2,HLA-DMA,CD226,AGER,GATA3,CCDC88B,HLA-E                                                |
| regulation of cell-cell adhesion                                                                                          | GO:0022407 | 3.6341E-05       | SIRPG,TYK2,HLA-DQA2,HLA-DMA,AGER,GATA3,CCDC88B,HLA-E,HFE                                                  |
| T cell activation                                                                                                         | GO:0042110 | 4.15657E-05      | SIRPG,TYK2,HLA-DQA2,HLA-DMA,AGER,GATA3,CCDC88B,HLA-E,HFE                                                  |
| leukocyte activation                                                                                                      | GO:0045321 | 9.82417E-05      | SIRPG,TYK2,HLA-DQA2,HLA-DMA,CD226,AGER,IKZF3,GATA3,CCDC88B,HLA-E,HFE                                      |
| positive regulation of lymphocyte activation                                                                              | GO:0051251 | 0.00016551       | SIRPG,TYK2,HLA-DQA2,HLA-DMA,AGER,GATA3,CCDC88B,HLA-E                                                      |
| regulation of cell adhesion                                                                                               | GO:0030155 | 0.000177624      | SIRPG,TYK2,HLA-DQA2,HLA-DMA,AGER,CARMIL1,GATA3,CCDC88B,HLA-E,HFE                                          |
| lymphocyte activation                                                                                                     | GO:0046649 | 0.000191511      | SIRPG,TYK2,HLA-DQA2,HLA-DMA,AGER,IKZF3,GATA3,CCDC88B,HLA-E,HFE                                            |
| cell activation                                                                                                           | GO:0001775 | 0.000430377      | SIRPG,TYK2,HLA-DQA2,HLA-DMA,CD226,AGER,IKZF3,GATA3,CCDC88B,HLA-E,HFE                                      |
| positive regulation of immune system process                                                                              | GO:0002684 | 0.000522713      | SIRPG,TYK2,UBASH3A,HLA-DQA2,HLA-DMA,CD226,IFIH1,AGER,GATA3,CCDC88B,HLA-E                                  |
| adaptive immune response based on somatic recombination of immune receptors built from immunoglobulin superfamily domains | GO:0002460 | 0.000606839      | TYK2,GNL1,CD226,AGER,CTSH,HLA-E,HFE                                                                       |
| T cell mediated immunity                                                                                                  | GO:0002456 | 0.000767274      | GNL1,AGER,CTSH,HLA-E,HFE                                                                                  |
| antigen processing and presentation                                                                                       | GO:0019882 | 0.00113965       | HLA-DQA2,HLA-DMA,CTSH,HLA-E,HFE                                                                           |
| immune response                                                                                                           | GO:0006955 | 0.001252137      | TYK2,UBASH3A,HLA-DQA2,GNL1,TRIM38,CD226,IFIH1,AGER,CTSH,GATA3,IL2RA,HLA-E,HFE                             |

|                                                                                                                                         |            |             |                                                                        |
|-----------------------------------------------------------------------------------------------------------------------------------------|------------|-------------|------------------------------------------------------------------------|
| adaptive immune response                                                                                                                | GO:0002250 | 0.002437839 | TYK2,GNL1,CD226,AGER,CTSH,HLA-E,HFE                                    |
| regulation of adaptive immune response based on somatic recombination of immune receptors built from immunoglobulin superfamily domains | GO:0002822 | 0.006071685 | TYK2,CD226,AGER,HLA-E,HFE                                              |
| antigen processing and presentation of peptide antigen                                                                                  | GO:0048002 | 0.006205081 | HLA-DQA2,HLA-DMA,HLA-E,HFE                                             |
| cell-cell adhesion                                                                                                                      | GO:0098609 | 0.009888847 | SIRPG,TYK2,HLA-DQA2,HLA-DMA,AGER,GATA3,CCDC88B,HLA-E,HFE               |
| regulation of adaptive immune response                                                                                                  | GO:0002819 | 0.010401117 | TYK2,CD226,AGER,HLA-E,HFE                                              |
| positive regulation of cytokine production                                                                                              | GO:0001819 | 0.011036203 | TYK2,CD226,IFIH1,AGER,GATA3,CCDC88B,HLA-E                              |
| regulation of immune response                                                                                                           | GO:0050776 | 0.011499416 | TYK2,UBASH3A,CD226,IFIH1,AGER,CTSH,GATA3,HLA-E,HFE                     |
| cell adhesion                                                                                                                           | GO:0007155 | 0.011985623 | SIRPG,TYK2,HLA-DQA2,HLA-DMA,CD226,AGER,CARMIL1,GATA3,CCDC88B,HLA-E,HFE |
| lymphocyte mediated immunity                                                                                                            | GO:0002449 | 0.012552624 | GNL1,CD226,AGER,CTSH,HLA-E,HFE                                         |
| regulation of cytokine production                                                                                                       | GO:0001817 | 0.017996927 | TYK2,CD226,IFIH1,AGER,GATA3,CCDC88B,HLA-E,HFE                          |
| cytokine production                                                                                                                     | GO:0001816 | 0.019112397 | TYK2,CD226,IFIH1,AGER,GATA3,CCDC88B,HLA-E,HFE                          |
| positive regulation of T cell proliferation                                                                                             | GO:0042102 | 0.020316181 | TYK2,AGER,CCDC88B,HLA-E                                                |
| regulation of lymphocyte proliferation                                                                                                  | GO:0050670 | 0.022635044 | TYK2,AGER,IKZF3,CCDC88B,HLA-E                                          |
| positive regulation of multicellular organismal process                                                                                 | GO:0051240 | 0.023294149 | SIRPG,TYK2,HLA-DQA2,HLA-DMA,CD226,IFIH1,AGER,CTSH,GATA3,CCDC88B,HLA-E  |
| regulation of mononuclear cell proliferation                                                                                            | GO:0032944 | 0.023959438 | TYK2,AGER,IKZF3,CCDC88B,HLA-E                                          |
| regulation of alpha-beta T cell activation                                                                                              | GO:0046634 | 0.025999862 | TYK2,AGER,HLA-E,HFE                                                    |
| regulation of leukocyte proliferation                                                                                                   | GO:0070663 | 0.039796719 | TYK2,AGER,IKZF3,CCDC88B,HLA-E                                          |
| leukocyte mediated immunity                                                                                                             | GO:0002443 | 0.04254617  | GNL1,CD226,AGER,CTSH,HLA-E,HFE                                         |
| antigen processing and presentation of exogenous peptide antigen                                                                        | GO:0002478 | 0.048019857 | HLA-DQA2,HLA-DMA,HLA-E                                                 |

Notes: adjusted\_p\_value is the p-value that corrected by g:SCS (Set Counts and Sizes)

| Supplementary Table 6. Selected IVs in MR analysis (replication phase) |                   |         |             |    |    |          |        |       |           |            |         |        |       |       |            |
|------------------------------------------------------------------------|-------------------|---------|-------------|----|----|----------|--------|-------|-----------|------------|---------|--------|-------|-------|------------|
| exposure                                                               | outcome           | F-value | SNP         | A1 | A2 | exposure |        |       |           |            | outcome |        |       |       |            |
|                                                                        |                   |         |             |    |    | eaf      | beta   | se    | pval      | samplesize | eaf     | beta   | se    | pval  | samplesize |
| Type 1 diabetes                                                        | COVID-19 positive | 1403.56 | rs10230978  | A  | G  | 0.685    | -0.154 | 0.028 | 3.80E-08  | 14741      | 0.275   | -0.012 | 0.014 | 0.373 | 98377      |
|                                                                        |                   |         | rs1042136   | C  | A  | 0.789    | 0.330  | 0.032 | 6.19E-25  | 14741      | 0.162   | -0.003 | 0.017 | 0.849 | 98377      |
|                                                                        |                   |         | rs10774624  | A  | G  | 0.530    | -0.291 | 0.025 | 2.58E-31  | 14741      | 0.512   | 0.006  | 0.013 | 0.620 | 98377      |
|                                                                        |                   |         | rs10814917  | G  | A  | 0.527    | -0.149 | 0.025 | 2.52E-09  | 14741      | 0.498   | -0.015 | 0.013 | 0.225 | 98377      |
|                                                                        |                   |         | rs10840595  | T  | C  | 0.843    | 0.225  | 0.035 | 1.29E-10  | 14741      | 0.167   | -0.014 | 0.017 | 0.408 | 98377      |
|                                                                        |                   |         | rs11042751  | C  | T  | 0.781    | -0.335 | 0.039 | 8.72E-18  | 14741      | 0.242   | 0.014  | 0.015 | 0.341 | 98377      |
|                                                                        |                   |         | rs111568057 | T  | C  | 0.972    | 0.814  | 0.088 | 2.24E-20  | 14741      | 0.022   | -0.039 | 0.044 | 0.381 | 98377      |
|                                                                        |                   |         | rs114355928 | T  | G  | 0.979    | 1.559  | 0.077 | 3.79E-91  | 14741      | 0.029   | -0.020 | 0.037 | 0.597 | 98377      |
|                                                                        |                   |         | rs114653220 | C  | T  | 0.976    | -1.744 | 0.222 | 3.97E-15  | 14741      | 0.003   | 0.041  | 0.154 | 0.791 | 98377      |
|                                                                        |                   |         | rs115008112 | A  | G  | 0.908    | -0.622 | 0.069 | 1.98E-19  | 14741      | 0.075   | 0.042  | 0.024 | 0.080 | 98377      |
|                                                                        |                   |         | rs11539216  | A  | G  | 0.950    | -0.892 | 0.077 | 4.94E-31  | 14741      | 0.056   | 0.026  | 0.027 | 0.326 | 98377      |
|                                                                        |                   |         | rs115469976 | C  | T  | 0.982    | 1.717  | 0.091 | 2.09E-79  | 14741      | 0.031   | -0.044 | 0.036 | 0.218 | 98377      |
|                                                                        |                   |         | rs11727369  | A  | G  | 0.623    | 0.161  | 0.025 | 1.19E-10  | 14741      | 0.361   | -0.024 | 0.013 | 0.067 | 98377      |
|                                                                        |                   |         | rs11758136  | A  | G  | 0.959    | -0.632 | 0.090 | 2.18E-12  | 14741      | 0.026   | 0.065  | 0.040 | 0.099 | 98377      |
|                                                                        |                   |         | rs1233478   | T  | G  | 0.840    | 0.558  | 0.030 | 3.21E-77  | 14741      | 0.196   | 0.022  | 0.016 | 0.157 | 98377      |
|                                                                        |                   |         | rs1264622   | T  | C  | 0.842    | 0.373  | 0.029 | 7.36E-38  | 14741      | 0.200   | -0.002 | 0.016 | 0.876 | 98377      |
|                                                                        |                   |         | rs12722496  | G  | A  | 0.921    | -0.438 | 0.044 | 2.41E-23  | 14741      | 0.110   | -0.021 | 0.020 | 0.298 | 98377      |
|                                                                        |                   |         | rs12919083  | C  | A  | 0.671    | -0.218 | 0.027 | 6.80E-16  | 14741      | 0.323   | 0.007  | 0.013 | 0.600 | 98377      |
|                                                                        |                   |         | rs13215     | A  | C  | 0.932    | -0.378 | 0.066 | 1.02E-08  | 14741      | 0.051   | 0.022  | 0.028 | 0.441 | 98377      |
|                                                                        |                   |         | rs13437000  | C  | T  | 0.812    | -0.673 | 0.038 | 3.48E-70  | 14741      | 0.180   | 0.010  | 0.016 | 0.519 | 98377      |
|                                                                        |                   |         | rs138522604 | G  | T  | 0.985    | -1.246 | 0.198 | 3.12E-10  | 14741      | 0.011   | 0.028  | 0.060 | 0.640 | 98377      |
|                                                                        |                   |         | rs143933760 | T  | C  | 0.989    | 1.613  | 0.127 | 5.85E-37  | 14741      | 0.008   | -0.011 | 0.072 | 0.879 | 98377      |
|                                                                        |                   |         | rs144112342 | C  | T  | 0.980    | -1.231 | 0.142 | 4.36E-18  | 14741      | 0.025   | -0.023 | 0.041 | 0.580 | 98377      |
|                                                                        |                   |         | rs145130687 | G  | T  | 0.973    | -0.684 | 0.082 | 7.34E-17  | 14741      | 0.045   | -0.002 | 0.030 | 0.960 | 98377      |
|                                                                        |                   |         | rs145568234 | G  | T  | 0.986    | -0.932 | 0.129 | 5.02E-13  | 14741      | 0.025   | -0.018 | 0.044 | 0.688 | 98377      |
|                                                                        |                   |         | rs148347131 | T  | C  | 0.974    | 0.587  | 0.082 | 8.15E-13  | 14741      | 0.021   | 0.032  | 0.052 | 0.545 | 98377      |
|                                                                        |                   |         | rs148571474 | T  | C  | 0.971    | -0.633 | 0.105 | 1.65E-09  | 14741      | 0.026   | 0.072  | 0.040 | 0.073 | 98377      |
|                                                                        |                   |         | rs148600179 | C  | T  | 0.828    | 0.446  | 0.043 | 3.32E-25  | 14741      | 0.158   | -0.004 | 0.021 | 0.847 | 98377      |
|                                                                        |                   |         | rs148759934 | T  | C  | 0.984    | -0.959 | 0.148 | 9.19E-11  | 14741      | 0.015   | -0.019 | 0.052 | 0.721 | 98377      |
|                                                                        |                   |         | rs169504    | A  | C  | 0.852    | 1.021  | 0.032 | 1.00E-200 | 14741      | 0.185   | 0.002  | 0.016 | 0.907 | 98377      |
|                                                                        |                   |         | rs17207622  | T  | G  | 0.971    | -0.897 | 0.112 | 1.16E-15  | 14741      | 0.026   | -0.039 | 0.039 | 0.316 | 98377      |
|                                                                        |                   |         | rs17208209  | A  | G  | 0.981    | -1.872 | 0.234 | 1.24E-15  | 14741      | 0.023   | -0.004 | 0.045 | 0.935 | 98377      |
|                                                                        |                   |         | rs184489107 | T  | C  | 0.984    | 1.338  | 0.110 | 4.85E-34  | 14741      | 0.010   | 0.177  | 0.061 | 0.004 | 98377      |
|                                                                        |                   |         | rs209139    | A  | C  | 0.958    | -0.556 | 0.063 | 1.09E-18  | 14741      | 0.058   | 0.002  | 0.027 | 0.946 | 98377      |
|                                                                        |                   |         | rs210211    | A  | G  | 0.894    | 0.364  | 0.047 | 9.58E-15  | 14741      | 0.897   | -0.007 | 0.021 | 0.752 | 98377      |
|                                                                        |                   |         | rs2267633   | G  | A  | 0.894    | -0.528 | 0.044 | 3.55E-33  | 14741      | 0.123   | 0.002  | 0.019 | 0.914 | 98377      |
|                                                                        |                   |         | rs2269242   | A  | G  | 0.765    | 0.168  | 0.030 | 2.14E-08  | 14741      | 0.201   | 0.011  | 0.016 | 0.474 | 98377      |
|                                                                        |                   |         | rs2383983   | G  | A  | 0.612    | 0.138  | 0.025 | 3.39E-08  | 14741      | 0.367   | 0.011  | 0.013 | 0.387 | 98377      |
|                                                                        |                   |         | rs2516491   | C  | A  | 0.748    | 0.841  | 0.029 | 6.58E-185 | 14741      | 0.274   | -0.020 | 0.014 | 0.158 | 98377      |
|                                                                        |                   |         | rs2532924   | C  | T  | 0.568    | 0.359  | 0.029 | 3.38E-35  | 14741      | 0.567   | -0.025 | 0.012 | 0.047 | 98377      |
|                                                                        |                   |         | rs2596501   | T  | C  | 0.534    | -0.404 | 0.025 | 9.66E-59  | 14741      | 0.470   | 0.006  | 0.013 | 0.631 | 98377      |
|                                                                        |                   |         | rs2726039   | A  | G  | 0.586    | 0.147  | 0.026 | 1.57E-08  | 14741      | 0.401   | -0.002 | 0.013 | 0.859 | 98377      |
|                                                                        |                   |         | rs2734973   | T  | C  | 0.872    | -0.453 | 0.043 | 5.97E-26  | 14741      | 0.122   | 0.014  | 0.019 | 0.458 | 98377      |
|                                                                        |                   |         | rs2791332   | T  | C  | 0.749    | 0.328  | 0.026 | 1.74E-36  | 14741      | 0.288   | 0.001  | 0.014 | 0.924 | 98377      |
|                                                                        |                   |         | rs2844697   | T  | C  | 0.670    | 0.633  | 0.027 | 1.51E-121 | 14741      | 0.370   | 0.008  | 0.013 | 0.532 | 98377      |
|                                                                        |                   |         | rs2844746   | C  | T  | 0.633    | 0.483  | 0.026 | 4.94E-77  | 14741      | 0.629   | -0.005 | 0.013 | 0.690 | 98377      |
|                                                                        |                   |         | rs28752520  | C  | T  | 0.739    | -1.242 | 0.041 | 1.00E-200 | 14741      | 0.251   | 0.010  | 0.014 | 0.506 | 98377      |
|                                                                        |                   |         | rs2894233   | G  | A  | 0.985    | -1.788 | 0.243 | 1.87E-13  | 14741      | 0.024   | -0.059 | 0.046 | 0.202 | 98377      |
|                                                                        |                   |         | rs3087243   | A  | G  | 0.530    | -0.178 | 0.025 | 1.08E-12  | 14741      | 0.450   | 0.003  | 0.013 | 0.819 | 98377      |
|                                                                        |                   |         | rs3180379   | A  | C  | 0.715    | -0.829 | 0.042 | 1.02E-86  | 14741      | 0.265   | -0.019 | 0.016 | 0.236 | 98377      |
|                                                                        |                   |         | rs33998987  | C  | T  | 0.664    | -0.198 | 0.028 | 1.53E-12  | 14741      | 0.329   | -0.016 | 0.013 | 0.217 | 98377      |
|                                                                        |                   |         | rs34302671  | G  | A  | 0.903    | -0.249 | 0.043 | 7.01E-09  | 14741      | 0.106   | -0.014 | 0.020 | 0.484 | 98377      |
|                                                                        |                   |         | rs34569761  | G  | A  | 0.910    | 0.408  | 0.035 | 2.11E-31  | 14741      | 0.120   | 0.011  | 0.019 | 0.559 | 98377      |
|                                                                        |                   |         | rs34613987  | T  | C  | 0.919    | 0.423  | 0.035 | 1.26E-33  | 14741      | 0.122   | 0.019  | 0.019 | 0.308 | 98377      |
|                                                                        |                   |         | rs35029304  | C  | T  | 0.969    | -0.468 | 0.070 | 2.30E-11  | 14741      | 0.052   | -0.049 | 0.028 | 0.084 | 98377      |
|                                                                        |                   |         | rs374532386 | T  | C  | 0.973    | 1.078  | 0.081 | 2.06E-40  | 14741      | 0.017   | -0.010 | 0.072 | 0.888 | 98377      |
|                                                                        |                   |         | rs4850921   | T  | G  | 0.619    | -0.146 | 0.026 | 1.96E-08  | 14741      | 0.360   | -0.016 | 0.013 | 0.208 | 98377      |
|                                                                        |                   |         | rs4959027   | G  | A  | 0.793    | 2.094  | 0.061 | 1.00E-200 | 14741      | 0.765   | -0.006 | 0.015 | 0.668 | 98377      |
|                                                                        |                   |         | rs4999716   | A  | C  | 0.897    | 0.550  | 0.040 | 5.09E-43  | 14741      | 0.094   | 0.033  | 0.022 | 0.134 | 98377      |
|                                                                        |                   |         | rs56376830  | G  | A  | 0.686    | -0.392 | 0.034 | 9.38E-31  | 14741      | 0.340   | 0.005  | 0.013 | 0.727 | 98377      |
|                                                                        |                   |         | rs58540156  | T  | C  | 0.979    | 0.818  | 0.114 | 7.21E-13  | 14741      | 0.014   | 0.005  | 0.061 | 0.935 | 98377      |
|                                                                        |                   |         | rs6043405   | C  | T  | 0.662    | 0.144  | 0.026 | 3.05E-08  | 14741      | 0.649   | -0.004 | 0.013 | 0.748 | 98377      |
|                                                                        |                   |         | rs62395766  | C  | A  | 0.989    | -1.077 | 0.164 | 5.13E-11  | 14741      | 0.016   | 0.044  | 0.050 | 0.376 | 98377      |
|                                                                        |                   |         | rs6679677   | A  | C  | 0.909    | 0.695  | 0.038 | 1.00E-74  | 14741      | 0.101   | 0.028  | 0.021 | 0.183 | 98377      |
|                                                                        |                   |         | rs6902536   | G  | A  | 0.901    | -1.451 | 0.083 | 1.97E-68  | 14741      | 0.079   | 0.000  | 0.025 | 0.990 | 98377      |
|                                                                        |                   |         | rs6908626   | T  | G  | 0.823    | 0.216  | 0.034 | 2.11E-10  | 14741      | 0.176   | -0.011 | 0.017 | 0.513 | 98377      |
|                                                                        |                   |         | rs6926599   | A  | G  | 0.973    | 0.357  | 0.059 | 1.44E-09  | 14741      | 0.036   | 0.006  | 0.033 | 0.851 | 98377      |
|                                                                        |                   |         | rs7226035   | T  | C  | 0.606    | 0.162  | 0.026 | 4.64E-10  | 14741      | 0.647   | -0.007 | 0.013 | 0.599 | 98377      |
|                                                                        |                   |         | rs7297175   | C  | T  | 0.588    | -0.246 | 0.025 | 7.57E-23  | 14741      | 0.569   | 0.035  | 0.013 | 0.005 | 98377      |
|                                                                        |                   |         | rs74598819  | G  | A  | 0.982    | 0.986  | 0.117 | 3.54E-17  | 14741      | 0.020   | -0.038 | 0.046 | 0.407 | 98377      |
|                                                                        |                   |         | rs7481173   | G  | T  | 0.674    | 0.242  | 0.029 | 7.13E-17  | 14741      | 0.341   | -0.010 | 0.013 | 0.453 | 98377      |
|                                                                        |                   |         | rs767896    | T  | C  | 0.653    | -0.282 | 0.029 | 2.38E-22  | 14741      | 0.301   | -0.021 | 0.014 | 0.119 | 98377      |
|                                                                        |                   |         | rs7766015   | C  | T  | 0.560    | -0.266 | 0.025 | 1.94E-26  | 14741      | 0.576   | -0.001 | 0.013 | 0.957 | 98377      |
|                                                                        |                   |         | rs7776597   | G  | A  | 0.973    | 0.363  | 0.066 | 3.80E-08  | 14741      | 0.955   | -0.044 | 0.030 | 0.140 | 98377      |
|                                                                        |                   |         | rs78037977  | G  | A  | 0.882    | -0.249 | 0.042 | 3.06E-09  | 14741      | 0.125   | 0.001  | 0.019 | 0.960 | 98377      |
|                                                                        |                   |         | rs80054410  | C  | T  | 0.643    | 0.175  | 0.025 | 2.56E-12  | 14741      | 0.374   | -0.011 | 0.013 | 0.378 | 98377      |

|  |  |  |  |  |  |             |   |   |       |        |       |           |       |       |        |       |       |       |
|--|--|--|--|--|--|-------------|---|---|-------|--------|-------|-----------|-------|-------|--------|-------|-------|-------|
|  |  |  |  |  |  | rs1042136   | C | A | 0.789 | 0.330  | 0.032 | 6.19E-25  | 14741 | 0.161 | 0.021  | 0.042 | 0.618 | 16551 |
|  |  |  |  |  |  | rs10774624  | A | G | 0.530 | -0.291 | 0.025 | 2.58E-31  | 14741 | 0.514 | 0.002  | 0.031 | 0.937 | 16551 |
|  |  |  |  |  |  | rs10814917  | G | A | 0.527 | -0.149 | 0.025 | 2.52E-09  | 14741 | 0.496 | 0.042  | 0.031 | 0.172 | 16551 |
|  |  |  |  |  |  | rs10840595  | T | C | 0.843 | 0.225  | 0.035 | 1.29E-10  | 14741 | 0.166 | 0.023  | 0.042 | 0.581 | 16551 |
|  |  |  |  |  |  | rs11042751  | C | T | 0.781 | -0.335 | 0.039 | 8.72E-18  | 14741 | 0.245 | 0.034  | 0.036 | 0.344 | 16551 |
|  |  |  |  |  |  | rs111568057 | T | C | 0.972 | 0.814  | 0.088 | 2.24E-20  | 14741 | 0.021 | -0.054 | 0.109 | 0.621 | 16551 |
|  |  |  |  |  |  | rs114355928 | T | G | 0.979 | 1.559  | 0.077 | 3.79E-91  | 14741 | 0.028 | -0.019 | 0.092 | 0.840 | 16551 |
|  |  |  |  |  |  | rs114653220 | C | T | 0.976 | -1.744 | 0.222 | 3.97E-15  | 14741 | 0.003 | -0.335 | 0.391 | 0.392 | 16551 |
|  |  |  |  |  |  | rs115008112 | A | G | 0.908 | -0.622 | 0.069 | 1.98E-19  | 14741 | 0.077 | 0.008  | 0.059 | 0.888 | 16551 |
|  |  |  |  |  |  | rs11539216  | A | G | 0.950 | -0.892 | 0.077 | 4.94E-31  | 14741 | 0.058 | 0.041  | 0.067 | 0.541 | 16551 |
|  |  |  |  |  |  | rs115469976 | C | T | 0.982 | 1.717  | 0.091 | 2.09E-79  | 14741 | 0.030 | -0.076 | 0.090 | 0.402 | 16551 |
|  |  |  |  |  |  | rs11727369  | A | G | 0.623 | 0.161  | 0.025 | 1.19E-10  | 14741 | 0.356 | -0.007 | 0.032 | 0.816 | 16551 |
|  |  |  |  |  |  | rs11758136  | A | G | 0.959 | -0.632 | 0.090 | 2.18E-12  | 14741 | 0.027 | -0.069 | 0.093 | 0.457 | 16551 |
|  |  |  |  |  |  | rs1233478   | T | G | 0.840 | 0.558  | 0.030 | 3.21E-77  | 14741 | 0.200 | 0.033  | 0.039 | 0.395 | 16551 |
|  |  |  |  |  |  | rs1264622   | T | C | 0.842 | 0.373  | 0.029 | 7.36E-38  | 14741 | 0.201 | -0.017 | 0.038 | 0.665 | 16551 |
|  |  |  |  |  |  | rs12722496  | G | A | 0.921 | -0.438 | 0.044 | 2.41E-23  | 14741 | 0.109 | -0.041 | 0.050 | 0.414 | 16551 |
|  |  |  |  |  |  | rs12919083  | C | A | 0.671 | -0.218 | 0.027 | 6.80E-16  | 14741 | 0.324 | -0.005 | 0.033 | 0.879 | 16551 |
|  |  |  |  |  |  | rs13215     | A | C | 0.932 | -0.378 | 0.066 | 1.02E-08  | 14741 | 0.051 | 0.126  | 0.070 | 0.070 | 16551 |
|  |  |  |  |  |  | rs13437000  | C | T | 0.812 | -0.673 | 0.038 | 3.48E-70  | 14741 | 0.181 | -0.082 | 0.040 | 0.042 | 16551 |
|  |  |  |  |  |  | rs138522604 | G | T | 0.985 | -1.246 | 0.198 | 3.12E-10  | 14741 | 0.011 | -0.263 | 0.148 | 0.076 | 16551 |
|  |  |  |  |  |  | rs143933760 | T | C | 0.989 | 1.613  | 0.127 | 5.85E-37  | 14741 | 0.008 | -0.082 | 0.185 | 0.659 | 16551 |
|  |  |  |  |  |  | rs144112342 | C | T | 0.980 | -1.231 | 0.142 | 4.36E-18  | 14741 | 0.025 | 0.124  | 0.103 | 0.229 | 16551 |
|  |  |  |  |  |  | rs145130687 | G | T | 0.973 | -0.684 | 0.082 | 7.34E-17  | 14741 | 0.045 | 0.019  | 0.074 | 0.795 | 16551 |
|  |  |  |  |  |  | rs145568234 | G | T | 0.986 | -0.932 | 0.129 | 5.02E-13  | 14741 | 0.024 | -0.119 | 0.109 | 0.275 | 16551 |
|  |  |  |  |  |  | rs148347131 | T | C | 0.974 | 0.587  | 0.082 | 8.15E-13  | 14741 | 0.021 | 0.381  | 0.126 | 0.002 | 16551 |
|  |  |  |  |  |  | rs148571474 | T | C | 0.971 | -0.633 | 0.105 | 1.65E-09  | 14741 | 0.027 | 0.013  | 0.096 | 0.896 | 16551 |
|  |  |  |  |  |  | rs148600179 | C | T | 0.828 | 0.446  | 0.043 | 3.32E-25  | 14741 | 0.157 | -0.069 | 0.053 | 0.189 | 16551 |
|  |  |  |  |  |  | rs148759934 | T | C | 0.984 | -0.959 | 0.148 | 9.19E-11  | 14741 | 0.015 | 0.002  | 0.129 | 0.990 | 16551 |
|  |  |  |  |  |  | rs169504    | A | C | 0.852 | 1.021  | 0.032 | 1.00E-200 | 14741 | 0.186 | 0.023  | 0.040 | 0.570 | 16551 |
|  |  |  |  |  |  | rs17207622  | T | G | 0.971 | -0.897 | 0.112 | 1.16E-15  | 14741 | 0.026 | -0.096 | 0.096 | 0.320 | 16551 |
|  |  |  |  |  |  | rs17208209  | A | G | 0.981 | -1.872 | 0.234 | 1.24E-15  | 14741 | 0.023 | -0.157 | 0.113 | 0.163 | 16551 |
|  |  |  |  |  |  | rs184489107 | T | C | 0.984 | 1.338  | 0.110 | 4.85E-34  | 14741 | 0.012 | 0.145  | 0.142 | 0.308 | 16551 |
|  |  |  |  |  |  | rs209139    | A | C | 0.958 | -0.556 | 0.063 | 1.09E-18  | 14741 | 0.059 | 0.033  | 0.065 | 0.609 | 16551 |
|  |  |  |  |  |  | rs210211    | A | G | 0.894 | 0.364  | 0.047 | 9.58E-15  | 14741 | 0.896 | -0.087 | 0.050 | 0.083 | 16551 |
|  |  |  |  |  |  | rs2267633   | G | A | 0.894 | -0.528 | 0.044 | 3.55E-33  | 14741 | 0.123 | 0.053  | 0.047 | 0.263 | 16551 |
|  |  |  |  |  |  | rs2269242   | A | G | 0.765 | 0.168  | 0.030 | 2.14E-08  | 14741 | 0.203 | -0.002 | 0.038 | 0.966 | 16551 |
|  |  |  |  |  |  | rs2383983   | G | A | 0.612 | 0.138  | 0.025 | 3.39E-08  | 14741 | 0.369 | -0.019 | 0.032 | 0.557 | 16551 |
|  |  |  |  |  |  | rs2516491   | C | A | 0.748 | 0.841  | 0.029 | 6.58E-185 | 14741 | 0.272 | -0.024 | 0.035 | 0.489 | 16551 |
|  |  |  |  |  |  | rs2532924   | C | T | 0.568 | 0.359  | 0.029 | 3.38E-35  | 14741 | 0.563 | 0.039  | 0.031 | 0.206 | 16551 |
|  |  |  |  |  |  | rs2596501   | T | C | 0.534 | -0.404 | 0.025 | 9.66E-59  | 14741 | 0.469 | -0.041 | 0.031 | 0.187 | 16551 |
|  |  |  |  |  |  | rs2726039   | A | G | 0.586 | 0.147  | 0.026 | 1.57E-08  | 14741 | 0.399 | -0.008 | 0.032 | 0.789 | 16551 |
|  |  |  |  |  |  | rs2734973   | T | C | 0.872 | -0.453 | 0.043 | 5.97E-26  | 14741 | 0.123 | -0.044 | 0.047 | 0.349 | 16551 |
|  |  |  |  |  |  | rs2791332   | T | C | 0.749 | 0.328  | 0.026 | 1.74E-36  | 14741 | 0.289 | 0.004  | 0.034 | 0.900 | 16551 |
|  |  |  |  |  |  | rs2844697   | T | C | 0.670 | 0.633  | 0.027 | 1.51E-121 | 14741 | 0.372 | 0.019  | 0.031 | 0.546 | 16551 |
|  |  |  |  |  |  | rs2844746   | C | T | 0.633 | 0.483  | 0.026 | 4.94E-77  | 14741 | 0.628 | 0.007  | 0.032 | 0.829 | 16551 |
|  |  |  |  |  |  | rs28752520  | C | T | 0.739 | -1.242 | 0.041 | 1.00E-200 | 14741 | 0.252 | -0.053 | 0.036 | 0.138 | 16551 |
|  |  |  |  |  |  | rs2894233   | G | A | 0.985 | -1.788 | 0.243 | 1.87E-13  | 14741 | 0.023 | 0.186  | 0.117 | 0.110 | 16551 |
|  |  |  |  |  |  | rs3087243   | A | G | 0.530 | -0.178 | 0.025 | 1.08E-12  | 14741 | 0.451 | -0.015 | 0.031 | 0.637 | 16551 |
|  |  |  |  |  |  | rs3180379   | A | C | 0.715 | -0.829 | 0.042 | 1.02E-86  | 14741 | 0.262 | -0.029 | 0.040 | 0.466 | 16551 |
|  |  |  |  |  |  | rs33998987  | C | T | 0.664 | -0.198 | 0.028 | 1.53E-12  | 14741 | 0.326 | -0.004 | 0.033 | 0.897 | 16551 |
|  |  |  |  |  |  | rs34302671  | G | A | 0.903 | -0.249 | 0.043 | 7.01E-09  | 14741 | 0.105 | 0.063  | 0.050 | 0.213 | 16551 |
|  |  |  |  |  |  | rs34569761  | G | A | 0.910 | 0.408  | 0.035 | 2.11E-31  | 14741 | 0.122 | -0.010 | 0.048 | 0.835 | 16551 |
|  |  |  |  |  |  | rs34613987  | T | C | 0.919 | 0.423  | 0.035 | 1.26E-33  | 14741 | 0.125 | -0.001 | 0.047 | 0.982 | 16551 |
|  |  |  |  |  |  | rs35029304  | C | T | 0.969 | -0.468 | 0.070 | 2.30E-11  | 14741 | 0.050 | -0.100 | 0.073 | 0.170 | 16551 |
|  |  |  |  |  |  | rs374532386 | T | C | 0.973 | 1.078  | 0.081 | 2.06E-40  | 14741 | 0.017 | 0.086  | 0.176 | 0.626 | 16551 |
|  |  |  |  |  |  | rs4850921   | T | G | 0.619 | -0.146 | 0.026 | 1.96E-08  | 14741 | 0.357 | 0.030  | 0.032 | 0.349 | 16551 |
|  |  |  |  |  |  | rs4959027   | G | A | 0.793 | 2.094  | 0.061 | 1.00E-200 | 14741 | 0.764 | 0.008  | 0.036 | 0.836 | 16551 |
|  |  |  |  |  |  | rs4999716   | A | C | 0.897 | 0.550  | 0.040 | 5.09E-43  | 14741 | 0.095 | 0.050  | 0.054 | 0.353 | 16551 |
|  |  |  |  |  |  | rs56376830  | G | A | 0.686 | -0.392 | 0.034 | 9.38E-31  | 14741 | 0.342 | 0.018  | 0.032 | 0.581 | 16551 |
|  |  |  |  |  |  | rs58540156  | T | C | 0.979 | 0.818  | 0.114 | 7.21E-13  | 14741 | 0.014 | 0.175  | 0.151 | 0.244 | 16551 |
|  |  |  |  |  |  | rs6043405   | C | T | 0.662 | 0.144  | 0.026 | 3.05E-08  | 14741 | 0.648 | -0.010 | 0.032 | 0.762 | 16551 |
|  |  |  |  |  |  | rs62395766  | C | A | 0.989 | -1.077 | 0.164 | 5.13E-11  | 14741 | 0.016 | -0.135 | 0.120 | 0.263 | 16551 |
|  |  |  |  |  |  | rs6679677   | A | C | 0.909 | 0.695  | 0.038 | 1.00E-74  | 14741 | 0.104 | 0.032  | 0.050 | 0.527 | 16551 |
|  |  |  |  |  |  | rs6902536   | G | A | 0.901 | -1.451 | 0.083 | 1.97E-68  | 14741 | 0.078 | -0.005 | 0.061 | 0.928 | 16551 |
|  |  |  |  |  |  | rs6908626   | T | G | 0.823 | 0.216  | 0.034 | 2.11E-10  | 14741 | 0.175 | 0.006  | 0.041 | 0.881 | 16551 |
|  |  |  |  |  |  | rs6926599   | A | G | 0.973 | 0.357  | 0.059 | 1.44E-09  | 14741 | 0.037 | 0.066  | 0.081 | 0.416 | 16551 |
|  |  |  |  |  |  | rs7226035   | T | C | 0.606 | 0.162  | 0.026 | 4.64E-10  | 14741 | 0.646 | -0.021 | 0.032 | 0.525 | 16551 |
|  |  |  |  |  |  | rs7297175   | C | T | 0.588 | -0.246 | 0.025 | 7.57E-23  | 14741 | 0.576 | -0.009 | 0.031 | 0.783 | 16551 |
|  |  |  |  |  |  | rs74598819  | G | A | 0.982 | 0.986  | 0.117 | 3.54E-17  | 14741 | 0.018 | -0.108 | 0.113 | 0.340 | 16551 |
|  |  |  |  |  |  | rs7481173   | G | T | 0.674 | 0.242  | 0.029 | 7.13E-17  | 14741 | 0.339 | -0.007 | 0.033 | 0.827 | 16551 |
|  |  |  |  |  |  | rs767896    | T | C | 0.653 | -0.282 | 0.029 | 2.38E-22  | 14741 | 0.297 | -0.004 | 0.034 | 0.917 | 16551 |
|  |  |  |  |  |  | rs7766015   | C | T | 0.560 | -0.266 | 0.025 | 1.94E-26  | 14741 | 0.576 | 0.024  | 0.031 | 0.438 | 16551 |
|  |  |  |  |  |  | rs7776597   | G | A | 0.973 | 0.363  | 0.066 | 3.80E-08  | 14741 | 0.953 | -0.094 | 0.073 | 0.198 | 16551 |
|  |  |  |  |  |  | rs78037977  | G | A | 0.882 | -0.249 | 0.042 | 3.06E-09  | 14741 | 0.125 | -0.040 | 0.047 | 0.388 | 16551 |
|  |  |  |  |  |  | rs80054410  | C | T | 0.643 | 0.175  | 0.025 | 2.56E-12  | 14741 | 0.372 | 0.046  | 0.032 | 0.147 | 16551 |
|  |  |  |  |  |  | rs8283      | G | A | 0.792 | -0.736 | 0.041 | 4.69E-72  | 14741 | 0.173 | -0.023 | 0.041 | 0.570 | 16551 |
|  |  |  |  |  |  | rs9262551   | C | T | 0.973 | 1.167  | 0.085 | 6.77E-43  | 14741 | 0.022 | -0.015 | 0.103 | 0.888 | 16551 |
|  |  |  |  |  |  | rs9276931   | G | A | 0.912 | 0.873  | 0.038 | 8.54E-117 | 14741 | 0.116 | -0.021 | 0.048 | 0.657 | 16551 |
|  |  |  |  |  |  | rs9366622   | C | T | 0.862 | -0.327 | 0.034 | 6.74E-22  | 14741 | 0.858 | 0.062  | 0.045 | 0.162 | 16551 |

|                 |                |         |
|-----------------|----------------|---------|
| Type 1 diabetes | COVID-19 death | 1403.56 |
|-----------------|----------------|---------|

|                 |                                                  |        |             |        |       |           |        |       |           |       |       |        |       |       |       |
|-----------------|--------------------------------------------------|--------|-------------|--------|-------|-----------|--------|-------|-----------|-------|-------|--------|-------|-------|-------|
| Type 1 diabetes | COVID-19 recovery time with colchicine treatment | 357.72 | rs115008112 | A      | G     | 0.908     | -0.622 | 0.069 | 1.98E-19  | 14741 | 0.077 | -0.154 | 0.092 | 0.096 | 15815 |
|                 |                                                  |        | rs11539216  | A      | G     | 0.950     | -0.892 | 0.077 | 4.94E-31  | 14741 | 0.058 | -0.141 | 0.107 | 0.187 | 15815 |
|                 |                                                  |        | rs115469976 | C      | T     | 0.982     | 1.717  | 0.091 | 2.09E-79  | 14741 | 0.030 | -0.014 | 0.142 | 0.922 | 15815 |
|                 |                                                  |        | rs11727369  | A      | G     | 0.623     | 0.161  | 0.025 | 1.19E-10  | 14741 | 0.356 | -0.005 | 0.051 | 0.914 | 15815 |
|                 |                                                  |        | rs11758136  | A      | G     | 0.959     | -0.632 | 0.090 | 2.18E-12  | 14741 | 0.027 | -0.037 | 0.148 | 0.801 | 15815 |
|                 |                                                  |        | rs1233478   | T      | G     | 0.840     | 0.558  | 0.030 | 3.21E-77  | 14741 | 0.199 | 0.098  | 0.061 | 0.108 | 15815 |
|                 |                                                  |        | rs1264622   | T      | C     | 0.842     | 0.373  | 0.029 | 7.36E-38  | 14741 | 0.201 | 0.065  | 0.061 | 0.285 | 15815 |
|                 |                                                  |        | rs12722496  | G      | A     | 0.921     | -0.438 | 0.044 | 2.41E-23  | 14741 | 0.109 | 0.012  | 0.080 | 0.882 | 15815 |
|                 |                                                  |        | rs12919083  | C      | A     | 0.671     | -0.218 | 0.027 | 6.80E-16  | 14741 | 0.324 | -0.026 | 0.052 | 0.615 | 15815 |
|                 |                                                  |        | rs13215     | A      | C     | 0.932     | -0.378 | 0.066 | 1.02E-08  | 14741 | 0.051 | -0.056 | 0.111 | 0.615 | 15815 |
|                 |                                                  |        | rs13437000  | C      | T     | 0.812     | -0.673 | 0.038 | 3.48E-70  | 14741 | 0.182 | -0.117 | 0.064 | 0.070 | 15815 |
|                 |                                                  |        | rs138522604 | G      | T     | 0.985     | -1.246 | 0.198 | 3.12E-10  | 14741 | 0.012 | 0.041  | 0.237 | 0.862 | 15815 |
|                 |                                                  |        | rs143933760 | T      | C     | 0.989     | 1.613  | 0.127 | 5.85E-37  | 14741 | 0.008 | -0.078 | 0.292 | 0.790 | 15815 |
|                 |                                                  |        | rs144112342 | C      | T     | 0.980     | -1.231 | 0.142 | 4.36E-18  | 14741 | 0.025 | -0.034 | 0.161 | 0.834 | 15815 |
|                 |                                                  |        | rs145130687 | G      | T     | 0.973     | -0.684 | 0.082 | 7.34E-17  | 14741 | 0.045 | -0.022 | 0.117 | 0.851 | 15815 |
|                 |                                                  |        | rs145568234 | G      | T     | 0.986     | -0.932 | 0.129 | 5.02E-13  | 14741 | 0.025 | 0.060  | 0.172 | 0.726 | 15815 |
|                 |                                                  |        | rs148347131 | T      | C     | 0.974     | 0.587  | 0.082 | 8.15E-13  | 14741 | 0.021 | 0.264  | 0.200 | 0.186 | 15815 |
|                 |                                                  |        | rs148571474 | T      | C     | 0.971     | -0.633 | 0.105 | 1.65E-09  | 14741 | 0.027 | 0.274  | 0.150 | 0.067 | 15815 |
|                 |                                                  |        | rs148600179 | C      | T     | 0.828     | 0.446  | 0.043 | 3.32E-25  | 14741 | 0.157 | -0.027 | 0.084 | 0.751 | 15815 |
|                 |                                                  |        | rs148759934 | T      | C     | 0.984     | -0.959 | 0.148 | 9.19E-11  | 14741 | 0.015 | 0.067  | 0.211 | 0.749 | 15815 |
|                 |                                                  |        | rs169504    | A      | C     | 0.852     | 1.021  | 0.032 | 1.00E-200 | 14741 | 0.186 | 0.022  | 0.064 | 0.734 | 15815 |
|                 |                                                  |        | rs17207622  | T      | G     | 0.971     | -0.897 | 0.112 | 1.16E-15  | 14741 | 0.026 | -0.157 | 0.150 | 0.296 | 15815 |
|                 |                                                  |        | rs17208209  | A      | G     | 0.981     | -1.872 | 0.234 | 1.24E-15  | 14741 | 0.023 | -0.175 | 0.179 | 0.329 | 15815 |
|                 |                                                  |        | rs184489107 | T      | C     | 0.984     | 1.338  | 0.110 | 4.85E-34  | 14741 | 0.012 | -0.144 | 0.224 | 0.521 | 15815 |
|                 |                                                  |        | rs209139    | A      | C     | 0.958     | -0.556 | 0.063 | 1.09E-18  | 14741 | 0.059 | 0.026  | 0.104 | 0.806 | 15815 |
|                 |                                                  |        | rs210211    | A      | G     | 0.894     | 0.364  | 0.047 | 9.58E-15  | 14741 | 0.897 | -0.055 | 0.080 | 0.496 | 15815 |
|                 |                                                  |        | rs2267633   | G      | A     | 0.894     | -0.528 | 0.044 | 3.55E-33  | 14741 | 0.124 | 0.007  | 0.075 | 0.928 | 15815 |
|                 |                                                  |        | rs2269242   | A      | G     | 0.765     | 0.168  | 0.030 | 2.14E-08  | 14741 | 0.203 | 0.042  | 0.061 | 0.488 | 15815 |
|                 |                                                  |        | rs2383983   | G      | A     | 0.612     | 0.138  | 0.025 | 3.39E-08  | 14741 | 0.368 | 0.051  | 0.051 | 0.317 | 15815 |
|                 |                                                  |        | rs2516491   | C      | A     | 0.748     | 0.841  | 0.029 | 6.58E-185 | 14741 | 0.271 | 0.012  | 0.055 | 0.830 | 15815 |
|                 |                                                  |        | rs2532924   | C      | T     | 0.568     | 0.359  | 0.029 | 3.38E-35  | 14741 | 0.563 | -0.006 | 0.049 | 0.906 | 15815 |
|                 |                                                  |        | rs2596501   | T      | C     | 0.534     | -0.404 | 0.025 | 9.66E-59  | 14741 | 0.470 | -0.003 | 0.049 | 0.947 | 15815 |
|                 |                                                  |        | rs2726039   | A      | G     | 0.586     | 0.147  | 0.026 | 1.57E-08  | 14741 | 0.400 | -0.029 | 0.051 | 0.565 | 15815 |
|                 |                                                  |        | rs2734973   | T      | C     | 0.872     | -0.453 | 0.043 | 5.97E-26  | 14741 | 0.123 | -0.101 | 0.074 | 0.171 | 15815 |
|                 |                                                  |        | rs2791332   | T      | C     | 0.749     | 0.328  | 0.026 | 1.74E-36  | 14741 | 0.289 | 0.073  | 0.054 | 0.179 | 15815 |
|                 |                                                  |        | rs2844697   | T      | C     | 0.670     | 0.633  | 0.027 | 1.51E-121 | 14741 | 0.371 | 0.010  | 0.050 | 0.837 | 15815 |
|                 |                                                  |        | rs2844746   | C      | T     | 0.633     | 0.483  | 0.026 | 4.94E-77  | 14741 | 0.627 | 0.008  | 0.051 | 0.872 | 15815 |
|                 |                                                  |        | rs28752520  | C      | T     | 0.739     | -1.242 | 0.041 | 1.00E-200 | 14741 | 0.252 | -0.022 | 0.057 | 0.697 | 15815 |
|                 |                                                  |        | rs2894233   | G      | A     | 0.985     | -1.788 | 0.243 | 1.87E-13  | 14741 | 0.024 | -0.303 | 0.185 | 0.102 | 15815 |
|                 |                                                  |        | rs3087243   | A      | G     | 0.530     | -0.178 | 0.025 | 1.08E-12  | 14741 | 0.451 | -0.063 | 0.049 | 0.203 | 15815 |
|                 |                                                  |        | rs3180379   | A      | C     | 0.715     | -0.829 | 0.042 | 1.02E-86  | 14741 | 0.262 | -0.102 | 0.063 | 0.104 | 15815 |
|                 |                                                  |        | rs33998987  | C      | T     | 0.664     | -0.198 | 0.028 | 1.53E-12  | 14741 | 0.326 | 0.015  | 0.052 | 0.779 | 15815 |
|                 |                                                  |        | rs34302671  | G      | A     | 0.903     | -0.249 | 0.043 | 7.01E-09  | 14741 | 0.105 | 0.035  | 0.079 | 0.656 | 15815 |
|                 |                                                  |        | rs34569761  | G      | A     | 0.910     | 0.408  | 0.035 | 2.11E-31  | 14741 | 0.122 | 0.230  | 0.075 | 0.002 | 15815 |
|                 |                                                  |        | rs34613987  | T      | C     | 0.919     | 0.423  | 0.035 | 1.26E-33  | 14741 | 0.125 | 0.138  | 0.073 | 0.059 | 15815 |
|                 |                                                  |        | rs35029304  | C      | T     | 0.969     | -0.468 | 0.070 | 2.30E-11  | 14741 | 0.050 | 0.043  | 0.117 | 0.713 | 15815 |
|                 |                                                  |        | rs374532386 | T      | C     | 0.973     | 1.078  | 0.081 | 2.06E-40  | 14741 | 0.017 | -0.233 | 0.279 | 0.405 | 15815 |
|                 |                                                  |        | rs4850921   | T      | G     | 0.619     | -0.146 | 0.026 | 1.96E-08  | 14741 | 0.358 | -0.021 | 0.051 | 0.681 | 15815 |
|                 |                                                  |        | rs4959027   | G      | A     | 0.793     | 2.094  | 0.061 | 1.00E-200 | 14741 | 0.764 | 0.179  | 0.058 | 0.002 | 15815 |
|                 |                                                  |        | rs4999716   | A      | C     | 0.897     | 0.550  | 0.040 | 5.09E-43  | 14741 | 0.096 | -0.070 | 0.086 | 0.416 | 15815 |
|                 |                                                  |        | rs56376830  | G      | A     | 0.686     | -0.392 | 0.034 | 9.38E-31  | 14741 | 0.341 | 0.041  | 0.051 | 0.419 | 15815 |
|                 |                                                  |        | rs58540156  | T      | C     | 0.979     | 0.818  | 0.114 | 7.21E-13  | 14741 | 0.013 | 0.152  | 0.243 | 0.533 | 15815 |
|                 |                                                  |        | rs6043405   | C      | T     | 0.662     | 0.144  | 0.026 | 3.05E-08  | 14741 | 0.647 | 0.019  | 0.051 | 0.717 | 15815 |
|                 |                                                  |        | rs62395766  | C      | A     | 0.989     | -1.077 | 0.164 | 5.13E-11  | 14741 | 0.016 | -0.384 | 0.193 | 0.046 | 15815 |
|                 |                                                  |        | rs6679677   | A      | C     | 0.909     | 0.695  | 0.038 | 1.00E-74  | 14741 | 0.103 | 0.013  | 0.079 | 0.865 | 15815 |
|                 |                                                  |        | rs6902536   | G      | A     | 0.901     | -1.451 | 0.083 | 1.97E-68  | 14741 | 0.079 | 0.009  | 0.099 | 0.924 | 15815 |
|                 |                                                  |        | rs6908626   | T      | G     | 0.823     | 0.216  | 0.034 | 2.11E-10  | 14741 | 0.175 | 0.022  | 0.066 | 0.739 | 15815 |
|                 |                                                  |        | rs6926599   | A      | G     | 0.973     | 0.357  | 0.059 | 1.44E-09  | 14741 | 0.037 | 0.076  | 0.126 | 0.549 | 15815 |
|                 |                                                  |        | rs7226035   | T      | C     | 0.606     | 0.162  | 0.026 | 4.64E-10  | 14741 | 0.645 | -0.038 | 0.051 | 0.460 | 15815 |
|                 |                                                  |        | rs7297175   | C      | T     | 0.588     | -0.246 | 0.025 | 7.57E-23  | 14741 | 0.576 | -0.012 | 0.050 | 0.806 | 15815 |
|                 |                                                  |        | rs74598819  | G      | A     | 0.982     | 0.986  | 0.117 | 3.54E-17  | 14741 | 0.019 | -0.022 | 0.179 | 0.902 | 15815 |
|                 |                                                  |        | rs7481173   | G      | T     | 0.674     | 0.242  | 0.029 | 7.13E-17  | 14741 | 0.339 | -0.009 | 0.052 | 0.858 | 15815 |
|                 |                                                  |        | rs767896    | T      | C     | 0.653     | -0.282 | 0.029 | 2.38E-22  | 14741 | 0.297 | 0.008  | 0.054 | 0.882 | 15815 |
|                 |                                                  |        | rs7766015   | C      | T     | 0.560     | -0.266 | 0.025 | 1.94E-26  | 14741 | 0.576 | 0.048  | 0.050 | 0.334 | 15815 |
|                 |                                                  |        | rs7776597   | G      | A     | 0.973     | 0.363  | 0.066 | 3.80E-08  | 14741 | 0.953 | -0.007 | 0.115 | 0.952 | 15815 |
|                 |                                                  |        | rs78037977  | G      | A     | 0.882     | -0.249 | 0.042 | 3.06E-09  | 14741 | 0.125 | 0.065  | 0.074 | 0.381 | 15815 |
|                 |                                                  |        | rs80054410  | C      | T     | 0.643     | 0.175  | 0.025 | 2.56E-12  | 14741 | 0.371 | 0.008  | 0.051 | 0.878 | 15815 |
|                 |                                                  |        | rs8283      | G      | A     | 0.792     | -0.736 | 0.041 | 4.69E-72  | 14741 | 0.173 | -0.040 | 0.065 | 0.535 | 15815 |
|                 |                                                  |        | rs9262551   | C      | T     | 0.973     | 1.167  | 0.085 | 6.77E-43  | 14741 | 0.022 | -0.186 | 0.165 | 0.258 | 15815 |
|                 |                                                  |        | rs9276931   | G      | A     | 0.912     | 0.873  | 0.038 | 8.54E-117 | 14741 | 0.116 | 0.091  | 0.076 | 0.234 | 15815 |
|                 |                                                  |        | rs9366622   | C      | T     | 0.862     | -0.327 | 0.034 | 6.74E-22  | 14741 | 0.858 | -0.163 | 0.071 | 0.021 | 15815 |
|                 |                                                  |        | rs9380199   | G      | A     | 0.685     | 0.167  | 0.027 | 6.20E-10  | 14741 | 0.276 | 0.072  | 0.055 | 0.187 | 15815 |
|                 |                                                  |        | rs9467638   | A      | G     | 0.950     | 0.365  | 0.057 | 1.52E-10  | 14741 | 0.046 | 0.072  | 0.119 | 0.547 | 15815 |
|                 |                                                  |        | rs9501640   | C      | A     | 0.989     | -1.738 | 0.199 | 2.47E-18  | 14741 | 0.014 | 0.191  | 0.216 | 0.378 | 15815 |
|                 |                                                  |        | rs10814914  | C      | T     | 0.531     | -0.146 | 0.025 | 5.22E-09  | 14741 | 0.480 | 0.003  | 0.057 | 0.950 | 872   |
|                 |                                                  |        | rs11065979  | T      | C     | 0.561     | 0.270  | 0.025 | 3.44E-27  | 14741 | 0.450 | -0.097 | 0.057 | 0.090 | 872   |
|                 |                                                  |        | rs11171739  | T      | C     | 0.585     | -0.241 | 0.025 | 5.42E-22  | 14741 | 0.440 | 0.007  | 0.058 | 0.900 | 872   |
|                 |                                                  |        | rs11964507  | T      | C     | 0.950     | 0.294  | 0.052 | 1.57E-08  | 14741 | 0.067 | 0.007  | 0.110 | 0.950 | 872   |
| rs12126425      | G                                                | A      | 0.893       | 0.297  | 0.038 | 5.46E-15  | 14741  | 0.100 | 0.029     | 0.093 | 0.750 | 872    |       |       |       |
| rs1225716       | C                                                | A      | 0.749       | 0.328  | 0.026 | 1.74E-36  | 14741  | 0.250 | -0.046    | 0.070 | 0.510 | 872    |       |       |       |
| rs12828640      | G                                                | A      | 0.578       | -0.171 | 0.025 | 7.92E-12  | 14741  | 0.460 | 0.026     | 0.059 | 0.660 | 872    |       |       |       |
| rs1468253       | C                                                | T      | 0.833       | -0.198 | 0.034 | 5.76E-09  | 14741  | 0.170 | 0.025     | 0.075 | 0.740 | 872    |       |       |       |
| rs17133805      | C                                                | G      | 0.684       | -0.154 | 0.028 | 3.80E-08  | 14741  | 0.280 | -0.059    | 0.064 | 0.360 | 872    |       |       |       |
| rs17177816      | A                                                | G      | 0.960       | -0.661 | 0.068 | 2.46E-22  | 14741  | 0.063 | 0.110     | 0.120 | 0.350 | 872    |       |       |       |
| rs17212350      | G                                                | A      | 0.762       | -1.319 | 0.047 | 2.71E-173 | 14741  | 0.280 | -0.097    | 0.064 | 0.130 | 872    |       |       |       |
| rs2071590       | G                                                | A      | 0.636       | 0.627  | 0.029 | 1.15E-103 | 14741  | 0.360 | 0.041     | 0.062 | 0.510 | 872    |       |       |       |
| rs210120        | G                                                | A      | 0.572       | 0.273  | 0.025 | 9.25E-28  | 14741  | 0.500 | 0.000     | 0.058 | 1.000 | 872    |       |       |       |

Notes: MR: mendelian randomization, A1: effect allele; A2: other allele; beta: estimate coefficient, se: standard error of coefficient estimate
